# Supplementary material for: Angiogenic factors during pregnancy in Asian women with elevated blood pressure in early pregnancy and the risk of preeclampsia: a longitudinal cohort study
Source: PubMed Central journal article supplement — BMJ Open. 2019 Dec 1;9(11):e032237. doi: 10.1136/bmjopen-2019-032237 (PMC6924722; doi:10.1136/bmjopen-2019-032237), 2019-12-01
Supplement: bmjopen-2019-032237.draft_revisions.pdf [file bmjopen-2019-032237.draft_revisions.pdf]

# BMJ Open

BMJ Open is committed to open peer review. As part of this commitment we make the peer review history of every article we publish publicly available.

When an article is published we post the peer reviewers' comments and the authors' responses online. We also post the versions of the paper that were used during peer review. These are the versions that the peer review comments apply to.

The versions of the paper that follow are the versions that were submitted during the peer review process. They are not the versions of record or the final published versions. They should not be cited or distributed as the published version of this manuscript.

BMJ Open is an open access journal and the full, final, typeset and author-corrected version of record of the manuscript is available on our site with no access controls, subscription charges or pay-per-view fees (<http://bmjopen.bmj.com>).

If you have any questions on BMJ Open's open peer review process please email [info.bmjopen@bmj.com](mailto:info.bmjopen@bmj.com)

# BMJ Open

## Angiogenic Factors during Pregnancy in Asian Women with Elevated Blood Pressure in Early Pregnancy and the Risk of Preeclampsia: a longitudinal cohort study

|                               |                                                                                                                                                                                                                                                                                                                                                                                                                                                                                                                                                                                                                                                     |
|-------------------------------|-----------------------------------------------------------------------------------------------------------------------------------------------------------------------------------------------------------------------------------------------------------------------------------------------------------------------------------------------------------------------------------------------------------------------------------------------------------------------------------------------------------------------------------------------------------------------------------------------------------------------------------------------------|
| Journal:                      | <i>BMJ Open</i>                                                                                                                                                                                                                                                                                                                                                                                                                                                                                                                                                                                                                                     |
| Manuscript ID                 | bmjopen-2019-032237                                                                                                                                                                                                                                                                                                                                                                                                                                                                                                                                                                                                                                 |
| Article Type:                 | Research                                                                                                                                                                                                                                                                                                                                                                                                                                                                                                                                                                                                                                            |
| Date Submitted by the Author: | 09-Jun-2019                                                                                                                                                                                                                                                                                                                                                                                                                                                                                                                                                                                                                                         |
| Complete List of Authors:     | Zhu, Jing; MOE-Shanghai Key Laboratory of Children's Environmental Health, Xinhua Hospital, Shanghai Jiao Tong University School of Medicine, Shanghai, China<br>Zhang, Jun; Ministry of Education-Shanghai Key Laboratory of Children's Environmental Health, Xinhua Hospital, Shanghai Jiao Tong University School of Medicine<br>Ng, Mor Jack; KK Women's and Children's Hospital, Division of Obstetrics and Gynaecology<br>Chern, Bernard; KK Women's and Children's Hospital<br>Yeo, George S. H.; KK Women's and Children's Hospital, Singapore<br>Tan, Kok Hian; KK Women's and Children's Hospital, Division of Obstetrics and Gynaecology |
| Keywords:                     | blood pressure, soluble fms-like tyrosine kinase 1, placental growth factor, preeclampsia                                                                                                                                                                                                                                                                                                                                                                                                                                                                                                                                                           |
|                               |                                                                                                                                                                                                                                                                                                                                                                                                                                                                                                                                                                                                                                                     |

SCHOLARONE™  
Manuscripts

---

**Angiogenic Factors during Pregnancy in Asian Women with Elevated Blood  
Pressure in Early Pregnancy and the Risk of Preeclampsia:  
a longitudinal cohort study**

Jing Zhu,<sup>1</sup> Jun Zhang,<sup>1,2</sup> Mor Jack Ng,<sup>2</sup> Bernard Chern,<sup>2</sup> George SH Yeo,<sup>3</sup>

Kok Hian Tan <sup>2</sup>

<sup>1</sup>MOE-Shanghai Key Laboratory of Children's Environmental Health, Xinhua  
Hospital, Shanghai Jiao Tong University School of Medicine, Shanghai, China

<sup>2</sup>Division of Obstetrics and Gynaecology, KK Women's and Children's Hospital,  
Singapore

<sup>3</sup>Department of Maternal and Fetal Medicine, KK Women's and Children's Hospital,  
Singapore

**Corresponding Author:** Dr. Jun Zhang

Xinhua Hospital, Shanghai Jiao Tong University School of Medicine

No. 1665 Kongjiang Road, Shanghai, 200092, China

Telephone: 86-21-25078871

E-mail: junjimzhang@sina.com; zhangjun@xinquamed.com.cn

**Word count:** abstract 285; main text 2492

**Number of tables:** 4

**Number of figures:** 1

---

## Abstract

### Objective

It remains unclear what roles placenta-originated angiogenic factors play in the pathogenesis of preeclampsia among hypertensive women. We compared maternal soluble fms-like tyrosine kinase 1 (sFlt-1) and placental growth factor (PlGF) levels throughout pregnancy in women with normal blood pressure (BP), elevated BP and hypertension in early pregnancy and their risks of developing hypertensive disorders.

### Design

A prospective cohort study.

### Setting

KK Women's and Children's Hospital, Singapore.

### Participants

923 women with singleton pregnancy less than 14 weeks of gestation were included in the prospective Neonatal and Obstetrics Risks Assessment cohort between September 2010 and October 2014. Systolic, diastolic, mean arterial blood pressure (MAP) were measured at 11-14 weeks.

### Primary and secondary outcomes

Maternal serum sFlt-1, PlGF and sFlt-1/PlGF ratio were tested at 11-14 weeks, 18-22 weeks, 28-32 weeks and 34 weeks onwards of gestation. Preeclampsia was main pregnancy outcome.

### Results

Women were divided based on their BP in early pregnancy: normal (N=750), elevated BP (N=98) and hypertension (N=75). Maternal sFlt-1 levels and sFlt-1/PlGF ratios

1  
2  
3  
4 were higher in hypertensive women throughout pregnancy, but maternal PIGF levels  
5  
6 were not significantly lower. Rise in maternal systolic, diastolic BP and MAP at 11-  
7  
8 14 weeks were significantly associated with higher sFlt-1/PIGF ratios during  
9  
10 pregnancy. A 10 mmHg increase in MAP was associated with a 5.6-fold increase in  
11  
12 risk of preterm preeclampsia and a 3.3-fold increase in risk of term preeclampsia,  
13  
14 respectively.  
15  
16  
17  
18  
19

### 20 **Conclusion**

21  
22 Women with elevated blood pressure in early pregnancy already have a higher sFlt-  
23  
24 1/PIGF ratio in early gestation and throughout pregnancy, and an increased risk of  
25  
26 hypertensive complications. In contrast, PIGF levels in these women remain normal,  
27  
28 suggesting that it is the vascular dysfunction, not the placenta, that plays a critical role  
29  
30 in the pathogenesis of preeclampsia.  
31  
32  
33  
34  
35  
36  
37  
38  
39  
40

### 41 **Key words**

42  
43 blood pressure, soluble fms-like tyrosine kinase 1, placental growth factor,  
44  
45 preeclampsia  
46  
47  
48  
49  
50  
51  
52  
53  
54  
55  
56  
57  
58  
59  
60

---

### Strengths and limitations of the study

- This study was based on a well-performed perspective cohort with comprehensive information on clinical, biophysical and biochemical markers.
- Covariance analysis was performed to compare differences of angiogenic factors values among groups; multivariable logistic regression analysis was performed to evaluate the association between early pregnancy blood pressure and pregnancy outcomes.
- Given that most of our participants were low-risk pregnant women, our results may not be applicable to high-risk women.

---

## Introduction

The imbalance in placenta-originated angiogenic factors has been found to play an important role in the pathogenesis of preeclampsia in recent years. Soluble fms-like tyrosine kinase 1 (sFlt-1) and placental growth factor (PlGF) are the most studied proteins. sFlt-1, a splice variant of the vascular endothelial growth factor (VEGF) receptor Flt-1, is a circulating anti-angiogenic protein that inhibits proangiogenic factors-VEGF and placental growth factor (PlGF) signaling in the vasculature.<sup>1</sup> High levels of circulating sFlt-1 and low levels of PlGF were observed in women with established preeclampsia and even before the onset of clinical symptoms.<sup>2,3</sup> These promising findings have been adopted and recommended by the National Institute for Clinical Excellence (NICE) to rule out preeclampsia in women presenting with clinical suspicion.<sup>4</sup>

Numerous studies focused on the pathological effects of excess sFlt-1 on endothelial function. It was observed that overexpression of sFlt-1 produced a preeclampsia-like syndrome of hypertension, proteinuria and glomerular endotheliosis in experimental animals.<sup>5</sup> sFlt-1 is largely made by syncytiotrophoblast and secreted into maternal circulation.<sup>6</sup> Placental hypoxia may be one of the main triggers of inducing abundant sFlt-1 expression and leading to hypertensive complications.<sup>7,8</sup> However, this hypothesis may not totally explain why women with elevated blood pressure before pregnancy have a substantially higher risk of preeclampsia. The objective of this study is to examine the dynamic changes of angiogenic and anti-angiogenic factors

throughout pregnancy in Asian women with elevated blood pressure in early gestation and their risks of developing hypertensive disorders later in pregnancy.

## Methods

### Study design

The Neonatal and Obstetrics Risks Assessment (NORA) study was a prospective cohort conducted at the KK Women's and Children's Hospital (KKH) in Singapore.<sup>9</sup>

The cohort was set up to screen factors associated with adverse perinatal outcomes, with a focus on using clinical, biochemical and biophysical markers to predict the risks of pregnancy complications in early pregnancy. In brief, detailed interviews, ultrasound scans and blood sample collections were performed at recruitment (11 to 14 weeks), 18 to 22 weeks, 28 to 32 weeks and 34 weeks onward, respectively. All 4 antenatal visits also included measurement of maternal height and weight; recording of blood pressure by validated automated devices according to the recommendations of the American Heart Association.<sup>10</sup> Participants were closely followed up till their postnatal discharge from the hospital. Information on pregnancy complications, labor and delivery and neonatal outcomes was collected through medical chart review. The study protocol was approved by the SingHealth Centralised Institutional Review Board Ethics Committee, Singapore (CIRB Ref No. 2010/214/D), and a written informed consent was obtained from all participating women.

### Study population



The NORA cohort recruited women with confirmed singleton pregnancies less than 14 weeks of gestation between September 2010 and October 2014. The exclusion criteria were multiple gestation, severe medical conditions such as chronic renal disease or systemic lupus erythematosus and pregnancies complicated by aneuploidy or fetal anomaly. Gestational age was confirmed by ultrasound at recruitment. A total of 1013 women were enrolled and 934 of them completed all 4 antenatal visits. 8 participants were delivered elsewhere, leaving 926 eligible women in the cohort. To evaluate the impacts of maternal blood pressure in early pregnancy on angiogenic factors levels and pregnancy outcomes, we used blood pressure at recruitment (11-14 weeks) to classify women into normal, elevated and hypertension groups. As 3 women did not have blood pressure records at recruitment (11-14 weeks), we included 923 participants for the final analysis (Figure 1).

### Diagnosis

Preeclampsia was defined according to the guidelines of International Society for the Study of Hypertension in Pregnancy <sup>11</sup>: systolic blood pressure (SBP)  $\geq 140$  mmHg and/or diastolic blood pressure (DBP)  $\geq 90$  mmHg on at least two occasions four hours apart after 20 weeks of gestation in a previously normotensive women, and proteinuria: urinary albumin  $\geq 300$ mg/24 hours urine collection or  $\geq 1+$  dipstick. We used the gestational age at delivery to divide cases of preeclampsia into term ( $\geq 37$  weeks) and preterm term ( $< 37$  weeks). Gestational hypertension was defined as newly onset hypertension after 20 weeks of gestation without proteinuria. Chronic

hypertension was defined as women with history of hypertension before conception or the presence of hypertension before 20 weeks of gestation.

To explore the relationship between maternal blood pressure levels in the first trimester and pregnancy outcome, we followed the 2017 guideline from the American College of Cardiology and the American Heart Association (ACC/AHA).<sup>12</sup> Normal blood pressure was defined as SBP < 120 mmHg and DBP < 80 mmHg; elevated blood pressure was defined as SBP 120-129 mmHg and DBP < 80 mmHg; hypertension stage 1 as SBP 130-139 mmHg or DBP 80-89 mmHg and hypertension stage 2 as SBP ≥ 140 mmHg or DBP ≥ 90 mmHg.

### Measurement of blood pressure

Blood pressure was taken by validated automated devices which were calibrated periodically. The women were in the seated position and their arms were supported. A correct cuff size was used and the middle of cuff was positioned on woman's upper arm at the level of the right atrium. After a five-minute rest, blood pressure was measured by trained nurses and three recordings were made at 1-minute intervals. We calculated SBP and DBP as the average of the three measurements. Mean arterial pressure (MAP) was calculated from SBP and DBP measures using the following formula:  $MAP = DBP + 1/3 \times (SBP - DBP)$ . Blood pressure was modeled continuously in units of 10 mm of mercury (mmHg).

---

## Measurements of angiogenic factors

About 8 ml of maternal venous blood was collected in non-heparinised tubes at each antenatal visit. It was then centrifuged at 2000rpm for 15 minutes before separating and storing serum samples at -80°C for subsequent analysis. Serum levels of sFlt-1 and PlGF were determined by means of the fully automated Elecsys assays on an electrochemiluminescence immunoassay platform (cobas e411 analyzers, Roche Diagnostics). The detection limit was approximately 6 pg/ml for sFlt-1 and <2 pg/ml for PlGF.

## Statistical analysis

Normality of continuous variables was assessed by the Kolmogorov-Smirnov test. Numeric data were expressed as mean (standard deviation) or as median (interquartile range) for normally and non-normally distributed data, respectively. Maternal characteristics and pregnancy outcomes were compared among normal, elevated blood pressure and hypertension (stage 1 and stage 2) groups using one-way ANOVA or Kruskal-Wallis tests for continuous variables and  $\chi^2$  analysis for categorical variables. Covariance analysis and Dunnett test was used to compare differences of logarithm-transformed angiogenic factors values among groups adjusted for covariants. Geometric means and 95% confidence intervals were calculated by taking the exponent of the logarithm transformed mean. Linear regression analysis was performed to assess the association of blood pressure (10 mmHg) at recruitment with logarithm-transformed angiogenic factors values during pregnancy. Covariance

analysis and linear regression models were adjusted for maternal race, smoking during pregnancy, body mass index (BMI) and gestational age at blood collection as covariant. Logistic regression analysis was performed to evaluate the association between early pregnancy blood pressure (10 mmHg) and pregnancy outcomes with adjustment of potential confounders, including maternal age, race, education, maternal BMI at recruitment, chronic hypertension and preexisting diabetes mellitus. We used SAS version 9.4 (Cary, NC) for all statistical analyses.

## Results

A total of 923 participants in the NORA cohort were included in this analysis. Based on maternal blood pressure at recruitment at 11-14 weeks of gestation, 750 women were classified as normal blood pressure; 98 women as elevated blood pressure, and 75 women as hypertension (stage 1 and stage 2). A comparison of maternal characteristics and pregnancy outcomes are given in Table 1. Women with hypertension (stage 1 and stage 2) in the first trimester were slightly older than the other two groups. Chinese women contributed a greater proportion of hypertension (49.3%) than Indian (8.0%) and Malay (30.7%). A higher incidence of maternal overweight (BMI  $\geq 25$  kg/m<sup>2</sup>) and obesity (BMI  $\geq 30$  kg/m<sup>2</sup>) was observed in the elevated blood pressure group and hypertension group than in the normal blood pressure group.

Table 1. Characteristics and pregnancy outcomes by maternal blood pressure at 11-14 weeks in the NORA cohort.

| Variables                                                            | Normal BP<br>(n=750) | Elevated BP<br>(n=98) | Hypertension<br>(stage 1 and stage2)<br>(n=75) | <i>P</i> value |
|----------------------------------------------------------------------|----------------------|-----------------------|------------------------------------------------|----------------|
| Maternal age (year), median (IQR)                                    | 30.0 (26.0-34.0)     | 30.0 (26.0-35.0)      | 32.0 (29.0-35.0)                               | < 0.001        |
| Race, n (%)                                                          |                      |                       |                                                | 0.012          |
| Chinese                                                              | 393 (52.3)           | 38 (38.8)             | 37 (49.3)                                      |                |
| Indian                                                               | 88 (11.7)            | 6 (6.1)               | 6 (8.0)                                        |                |
| Malay                                                                | 186 (24.8)           | 41 (41.8)             | 23 (30.7)                                      |                |
| Others                                                               | 84 (11.2)            | 13 (13.3)             | 9 (12.0)                                       |                |
| Parity, n (%)                                                        |                      |                       |                                                | 0.091          |
| 0                                                                    | 419 (55.9)           | 49 (50.0)             | 33 (44.0)                                      |                |
| 1                                                                    | 236 (31.5)           | 32 (32.7)             | 25 (33.3)                                      |                |
| ≥ 2                                                                  | 95 (12.7)            | 17 (17.3)             | 17 (22.7)                                      |                |
| Maternal education levels, n (%)                                     |                      |                       |                                                | 0.044          |
| Less than high school                                                | 166 (22.2)           | 28 (28.6)             | 25 (33.3)                                      |                |
| High school                                                          | 299 (40.0)           | 44 (44.9)             | 23 (30.7)                                      |                |
| College and above                                                    | 282 (37.8)           | 26 (26.5)             | 27 (36.0)                                      |                |
| Married, n (%)                                                       | 699 (93.2)           | 90 (91.8)             | 72 (96.0)                                      | 0.544          |
| Smoking during pregnancy, n (%)                                      | 19 (2.5)             | 4 (4.1)               | 0 (0)                                          | 0.230          |
| Maternal BMI at 11-14 weeks of gestation (kg/m <sup>2</sup> ), n (%) |                      |                       |                                                | < 0.001        |
| < 18.5                                                               | 62 (8.3)             | 2 (2.0)               | 0 (0)                                          |                |
| 18.5-24.9                                                            | 475 (63.5)           | 32 (32.7)             | 16 (21.3)                                      |                |
| 25.0-29.9                                                            | 162 (21.7)           | 35 (35.7)             | 32 (42.7)                                      |                |
| ≥ 30.0                                                               | 49 (6.6)             | 29 (29.6)             | 27 (36.0)                                      |                |
| Diabetes mellitus, n (%)                                             | 7 (0.9)              | 2 (2.0)               | 5 (6.7)                                        | < 0.001        |
| ART conception, n (%)                                                | 31 (4.1)             | 4 (4.1)               | 2 (2.7)                                        | 0.826          |
| Antihypertensive medication, n (%)                                   | 0 (0)                | 0 (0)                 | 3 (4.0)                                        | < 0.001        |
| Pregnancy outcomes                                                   |                      |                       |                                                |                |
| Delivery age (weeks), median (IQR)                                   | 39.0 (38.1-39.7)     | 38.7 (38.0-39.6)      | 38.3 (37.6-39.1)                               | 0.001          |
| Birth weight (kg), median (IQR)                                      | 3.1 (2.9-3.4)        | 3.1 (2.9-3.5)         | 3.1 (2.8-3.4)                                  | 0.324          |
| Gestational hypertension, n (%)                                      | 10 (1.3)             | 3 (3.1)               | 5 (6.7)                                        | 0.004          |
| Preeclampsia, n (%)                                                  | 6 (0.8)              | 3 (3.1)               | 12 (16.0)                                      | < 0.001        |

|                             |         |         |         |         |
|-----------------------------|---------|---------|---------|---------|
| Preterm preeclampsia, n (%) | 4 (0.5) | 0 (0)   | 5 (6.7) | < 0.001 |
| Term preeclampsia, n (%)    | 2 (0.3) | 3 (3.1) | 7 (9.3) | < 0.001 |

IQR: interquartile range; BMI: body mass index; ART: assisted reproductive technology; BP: blood pressure.

The prevalence of maternal preconception diabetes was 6.7% in hypertension groups which was significantly higher than that of the other two groups. However, the prevalence of conception with assisted reproductive technology (ART) were not significantly different among the three groups. As expected, the incidence of gestational hypertension (6.7%), preeclampsia (16.0%), preterm preeclampsia (6.7%) and term preeclampsia (9.3%) were the highest in the hypertension group. Women with hypertension had sustainable higher blood pressure levels during pregnancy (Table 2).

Table 2. Maternal blood pressure levels at 4 time points during pregnancy by maternal blood pressure at 11-14weeks in the NORA cohort.

| Variables           | Normal BP<br>(n=750) | Elevated BP<br>(n=98) | Hypertension<br>(stage 1 and stage2)<br>(n=75) | <i>P</i> value |
|---------------------|----------------------|-----------------------|------------------------------------------------|----------------|
| SBP (mmHg), mean±SD |                      |                       |                                                |                |
| 11-14 weeks         | 104.9±8.3            | 123.2±2.6             | 126.8±11.1                                     | < 0.001        |
| 18-22 weeks         | 105.9±10.1           | 118.6±9.9             | 124.0±10.5                                     | < 0.001        |
| 28-32 weeks         | 108.2±10.0           | 118.1±9.7             | 123.8±11.4                                     | < 0.001        |
| ≥34 weeks           | 110.5±10.7           | 119.5±10.6            | 126.1±15.5                                     | < 0.001        |
| DBP (mmHg), mean±SD |                      |                       |                                                |                |
| 11-14 weeks         | 63.6±6.8             | 71.4±4.4              | 80.8±7.0                                       | < 0.001        |

|                     |          |          |           |         |
|---------------------|----------|----------|-----------|---------|
| 18-22 weeks         | 62.9±7.0 | 69.0±7.2 | 76.3±8.1  | < 0.001 |
| 28-32 weeks         | 64.0±6.9 | 69.8±6.6 | 76.6±9.0  | < 0.001 |
| ≥34 weeks           | 67.4±7.8 | 73.3±7.3 | 80.0±11.4 | < 0.001 |
| MAP (mmHg), mean±SD |          |          |           |         |
| 11-14 weeks         | 77.3±6.5 | 88.7±3.2 | 96.1±6.5  | < 0.001 |
| 18-22 weeks         | 77.2±7.2 | 85.5±7.3 | 92.2±8.2  | < 0.001 |
| 28-32 weeks         | 78.8±7.1 | 85.9±6.3 | 92.4±9.1  | < 0.001 |
| ≥34 weeks           | 81.8±8.1 | 88.7±7.6 | 95.4±11.9 | < 0.001 |

BP: blood pressure; SD: standard deviation; SBP: systolic blood pressure; DBP: diastolic blood pressure; MAP: mean arterial pressure

Table 3 shows the values of angiogenic factors at 4 time points in the NORA participants. We used covariance analysis to control for potential confounders that were reported to have impact on serum angiogenic proteins levels, including maternal race, smoking, maternal BMI and gestational age at blood collection. Overall, serum sFlt-1 concentrations continued rising throughout pregnancy. PlGF levels increased from the first trimester, peaked at 28-32 weeks and declined afterwards. Consequently, high levels of sFlt-1/PlGF ratio were observed both at 11-14 weeks and 34 weeks onwards. The dynamic change of serum angiogenic factors during pregnancy was observed in all 3 groups. Maternal serum sFlt-1 and PlGF levels were not significantly different between elevated BP group and normal BP group at 4 time points during pregnancy. In hypertension group, a trend of higher maternal sFlt-1 concentrations was observed from early pregnancy and it was dramatically increased

---

1  
2  
3  
4 during the third trimester compared with sFlt-1 levels in normotensive women. In  
5  
6  
7 contrast, PlGF concentrations were not significantly different between hypertension  
8  
9  
10 group and normal BP group. Thus, sFlt-1/PlGF ratio in hypertensive women was  
11  
12 significantly higher throughout pregnancy than that in normotensive women.  
13  
14  
15  
16  
17  
18  
19  
20  
21  
22  
23  
24  
25  
26  
27  
28  
29  
30  
31  
32  
33  
34  
35  
36  
37  
38  
39  
40  
41  
42  
43  
44  
45  
46  
47  
48  
49  
50  
51  
52  
53  
54  
55  
56  
57  
58  
59  
60

For peer review only



Table 3. Maternal serum angiogenic factors levels at 4 time points during pregnancy by maternal blood pressure at 11-14 weeks in the NORA cohort.

| Angiogenic factors | Time points | Normal BP |                   | Elevated BP |                   |           | Hypertension (stage 1 and stage 2) |                   |           |
|--------------------|-------------|-----------|-------------------|-------------|-------------------|-----------|------------------------------------|-------------------|-----------|
|                    |             | N         | mean (95%CI) *    | N           | mean (95%CI) *    | P value † | N                                  | mean (95%CI) *    | P value ‡ |
| sFlt-1 (pg/ml)     | 11-14 weeks | 746       | 1585 (1549, 1622) | 98          | 1722 (1585, 1862) | 0.096     | 75                                 | 1758 (1585, 1950) | 0.079     |
|                    | 18-22 weeks | 745       | 1698 (1660, 1778) | 98          | 1738 (1585, 1950) | 0.824     | 75                                 | 1905 (1698, 2138) | 0.139     |
|                    | 28-32 weeks | 730       | 1660 (1585, 1698) | 92          | 1698 (1549, 1862) | 0.868     | 70                                 | 2042 (1820, 2291) | 0.001     |
|                    | ≥34 weeks   | 659       | 2570 (2512, 2692) | 82          | 2818 (2570, 3162) | 0.201     | 57                                 | 3311 (2951, 3802) | 0.000     |
| PlGF (pg/ml)       | 11-14 weeks | 746       | 37 (36, 38)       | 98          | 35 (32, 38)       | 0.243     | 75                                 | 35 (32, 39)       | 0.593     |
|                    | 18-22 weeks | 745       | 269 (257, 275)    | 98          | 245 (224, 269)    | 0.261     | 75                                 | 245 (219, 275)    | 0.364     |
|                    | 28-32 weeks | 730       | 617 (589, 646)    | 92          | 575 (501, 676)    | 0.718     | 70                                 | 537 (457, 631)    | 0.270     |
|                    | ≥34 weeks   | 659       | 380 (355, 398)    | 82          | 324 (269, 380)    | 0.178     | 57                                 | 339 (275, 427)    | 0.585     |
| sFlt-1/ PlGF ratio | 11-14 weeks | 746       | 42.7 (40.7, 44.7) | 98          | 50.1 (44.7, 55.0) | 0.013     | 75                                 | 50.1 (43.7, 56.2) | 0.042     |
|                    | 18-22 weeks | 745       | 6.5 (6.2, 6.8)    | 98          | 7.1 (6.3, 7.9)    | 0.201     | 75                                 | 7.8 (6.8, 8.9)    | 0.027     |
|                    | 28-32 weeks | 730       | 2.7 (2.5, 2.9)    | 92          | 2.9 (2.5, 3.5)    | 0.643     | 70                                 | 3.8 (3.1, 4.6)    | 0.005     |
|                    | ≥34 weeks   | 659       | 6.9 (6.3, 7.4)    | 82          | 8.9 (6.9, 11.2)   | 0.100     | 57                                 | 9.8 (7.4, 13.2)   | 0.044     |

BP, blood pressure; CI, confidence interval.

\*Means (95%CI) are adjusted for maternal race, smoking during pregnancy, maternal body mass index at blood test and gestational weeks at blood test from models with logarithm-transformed serum angiogenic factors levels as outcomes; presented as geometric means.

†statistically significant difference between normal BP and elevated BP groups.

‡statistically significant difference between normal BP and hypertension group.

Higher levels of DBP and MAP in early pregnancy were significantly associated with higher log-transformed sFlt-1 values throughout pregnancy. Meanwhile, higher SBP levels were significantly associated with lower log-transformed PlGF levels both at 18-22 weeks ( $\beta = -0.02$  per 10 mmHg SBP,  $P = 0.011$ ) and at 28-32 weeks ( $\beta = -0.02$  per 10 mmHg SBP,  $P = 0.031$ ). Thus, rises in maternal SBP, DBP and MAP in the first trimester were significantly associated with higher sFlt-1/PlGF ratios during pregnancy (supplementary table 1).

Table 4 presents the significant association between blood pressure in early pregnancy and risks of preeclampsia (OR 2.5, 95% CI 1.5-4.0 per 10 mmHg SBP; OR 4.3, 95% CI 2.3-7.9 per 10 mmHg DBP; OR 4.1, 95% CI 2.2-7.7 per 10 mmHg MAP, respectively) after adjustment of potential confounders. Preterm preeclampsia was more closely associated with higher DBP than SBP (OR 6.0, 95% CI 2.3-7.9 per 10 mmHg DBP vs. OR 1.9, 95% CI 0.9-3.8 per 10 mmHg SBP).

Table 4. Logistic regression analysis for maternal blood pressure at 11-14 weeks and adverse pregnancy outcomes.

| Variable     | Preeclampsia |                          | Preterm preeclampsia |                          | Term preeclampsia |                          |
|--------------|--------------|--------------------------|----------------------|--------------------------|-------------------|--------------------------|
|              | Crude OR     | Adjusted OR*<br>(95% CI) | Crude OR             | Adjusted OR*<br>(95% CI) | Crude OR          | Adjusted OR*<br>(95% CI) |
| SBP (10mmHg) | 3.0          | 2.5 (1.5, 4.0) †         | 1.9                  | 1.9 (0.9, 3.8)           | 4.1               | 3.2 (1.6, 6.4) †         |
| DBP (10mmHg) | 5.2          | 4.3 (2.3, 7.9) †         | 5.8                  | 6.0 (2.3, 16.2) †        | 4.4               | 3.1 (1.4, 6.8) †         |
| MAP (10mmHg) | 5.1          | 4.1 (2.2, 7.7) †         | 5.1                  | 5.6 (2.0, 15.5) †        | 4.7               | 3.3 (1.5, 7.4) †         |

OR, odds ratio; CI, confidence interval; SBP: systolic blood pressure; DBP: diastolic blood pressure; MAP: mean arterial pressure

\*Adjusted for maternal age, race, education, maternal body mass index at 11-14 weeks gestation and diabetes mellitus.

† $P < 0.01$ .

---

## Discussion

Our study confirms that higher early pregnancy blood pressure levels are prospectively associated with increased risks of preeclampsia, including preterm and term preeclampsia. Furthermore, women with elevated blood pressure in early pregnancy already had a higher sFlt-1 level and sFlt-1/PlGF ratio in early gestation and throughout pregnancy. In contrast, PlGF levels in these women remained normal throughout gestation.

It is well established that women with chronic hypertension have several times the risk of preeclampsia than normotensive women.<sup>13</sup> However, the pathogenesis is poorly understood and what role these angiogenic and anti-angiogenic factors play remains unclear. Although syncytiotrophoblast is a major source of sFlt-1 production, peripheral blood monocytes produce a small amount of sFlt-1 further stimulated by inflammation.<sup>14,15</sup> As chronic hypertension is often related to a chronic inflammatory status,<sup>16</sup> the slightly increased sFlt-1 level in hypertensive women in early pregnancy, as observed in our study, may reflect the chronic inflammatory status in early pregnancy. Our results suggest an imbalanced angiogenic environment in early pregnancy along with chronic inflammation may injure maternal vascular function and cause a preexisting maternal endothelial dysfunction. The latter, in turn, increases the risk of hypertensive disorders in pregnancy.

1  
2  
3  
4 On the other hand, maternal circulating PIGF is highly expressed during pregnancy by  
5  
6 the placenta. It has both vasculogenic and angiogenic functions<sup>17</sup> and its level is likely  
7  
8 to reflect the placental health conditions. For example, low PIGF concentrations  
9  
10 preceding clinical onset of preeclampsia often occur in early-onset rather than late-  
11  
12 onset preeclampsia.<sup>18</sup> Women who develop preeclampsia with fetal growth restriction  
13  
14 (FGR) have further decreased PIGF levels compared with women who develop  
15  
16 preeclampsia without FGR.<sup>19-21</sup> Early-onset preeclampsia and placenta-derived FGR  
17  
18 are associated with placenta pathology including incomplete remodeling of spiral  
19  
20 arteries, acute atherosclerosis and thrombosis in spiral arteries and syncytiotrophoblast  
21  
22 necrosis.<sup>22,23</sup> In our study, women with elevated blood pressure in early pregnancy,  
23  
24 the PIGF level remained by and large normal throughout pregnancy and newborns'  
25  
26 birth weight was not significantly different among the three groups, suggesting that  
27  
28 the placental implantation and development may not be impaired in these women.  
29  
30  
31  
32  
33  
34  
35  
36  
37  
38  
39  
40

41 As poor placentation is not a unique cause of developing preeclampsia, enhanced  
42  
43 placental oxidative and endoplasmic reticulum stress and increased maternal systemic  
44  
45 inflammatory responses are thought to play crucial roles in preeclampsia as well.<sup>24,25</sup>  
46  
47 Thus, preexisting endothelial dysfunction in hypertensive women could be  
48  
49 exacerbated as a result of physiological burden of pregnancy even without an  
50  
51 abnormal placentation.<sup>26</sup> Taking all things considered, we propose that the imbalanced  
52  
53 angiogenic factors environment and, perhaps more importantly, preexisting  
54  
55 endothelial susceptibility and dysfunction, may play a critical role in the development  
56  
57  
58  
59  
60

---

of preeclampsia in women with elevated blood pressure in early pregnancy.

Our study was a well-performed prospective study with comprehensive information including clinical, biophysical and biochemical markers. The follow-up rate was 99.1% (926/934) at the end of pregnancy. Measurements of blood pressure and serum angiogenic factors were performed according to standardized protocols. In our study, three women reported using antihypertensive medications during pregnancy; thus, the results should not be affected by the medication issue. On the other hand, as most of our participants were low-risk pregnant women, our results may not be applicable to high-risk women.

### **Conclusion**

Women with elevated blood pressure in early pregnancy already have a higher sFlt-1/PIGF ratio in early gestation and throughout pregnancy, and an increased risk of hypertensive complications. In contrast, PIGF levels in these women remain normal throughout gestation, suggesting that it is the vascular dysfunction, not the placenta, that plays a critical role in the pathogenesis of preeclampsia. Our study also supports that preconception or early pregnancy high blood pressure, defined as SBP $\geq$ 130 mmHg or DBP $\geq$ 80 mmHg according to 2017 ACC/AHA guideline, should cause clinical awareness both during pregnancy and in their later life.

---

## Acknowledgments

We thank all the NORA cohort (Neonatal and Obstetrics Risks Assessment) participants for their commitment to the study, the NORA cohort investigators and staff.

## Author Contributions

JZ: performed the statistical analysis, searched literature and drafted the manuscript. JZ (corresponding author): had the original idea, provided guidance for the statistical analysis and revised the manuscript. MJN, BC, GSY and KHT: participated in the data collection, reviewed and revised the manuscript.

**Funding:** The authors received no financial support for the research, authorship, and/or publication of this article.

**Competing interests:** None declared.

---

## References

1. Kendall RL, Thomas KA. Inhibition of vascular endothelial cell growth factor activity by an endogenously encoded soluble receptor. *Proc Natl Acad Sci U S A* 1993; 90:10705-10709.
2. Levine RJ, Maynard SE, Qian C, Lim KH, England LJ, Yu KF, *et al.* Circulating angiogenic factors and the risk of preeclampsia. *N Engl J Med* 2004; 350(7): 672-83.
3. Zeisler H, Llurba E, Chantraine F, Vatish M, Staff AC, Sennström M, *et al.* Predictive Value of the sFlt-1: PlGF Ratio in Women with Suspected Preeclampsia. *N Engl J Med* 2016 Jan 7;374(1):13-22.
4. NICE. PlGF-based Testing to Help Diagnose Suspected Pre-eclampsia (Triage PlGF Test, Elecsys Immunoassay sFlt-1/PlGF Ratio, DELFIA Xpress PlGF 1-2-3 Test, and BRAHMS sFlt-1 Kryptor/BRAHMS PlGF plus Kryptor PE ratio). Diagnostics Guidance 23. London: NICE, 2016.
5. Maynard SE, Min JY, Merchan J, Lim KH, Li J, Mondal S, *et al.* Excess placental soluble fms-like tyrosine kinase 1 (sFlt1) may contribute to endothelial dysfunction, hypertension, and proteinuria in preeclampsia. *J Clin Invest* 2003;111(5):649-58.
6. Sela S, Itin A, Natanson-Yaron S, Greenfield C, Goldman-Wohl D, Yagel S, *et al.* A novel human-specific soluble vascular endothelial growth factor receptor 1: cell-type-specific splicing and implications to vascular endothelial growth factor homeostasis and preeclampsia. *Circ Res* 2008;102(12):1566-74.
7. Gerber HP, Condorelli F, Park J, Ferrara N. Differential transcriptional regulation of the two vascular endothelial growth factor receptor genes. Flt-1, but not Flk-1/KDR, is up-regulated by hypoxia. *J Biol Chem* 1997;272(38):23659-67.
8. Warrington JP, George EM, Palei AC, Spradley FT, Granger JP. Recent advances in the understanding of the pathophysiology of preeclampsia. *Hypertension* 2013;62(4):666-73.
9. Ng QJ, Zhang J, Dai F, Ng MJ, Razali NS, Win NM, *et al.* Neonatal and Obstetric

- 1  
2  
3  
4 Risk Assessment (NORA) Pregnancy Cohort Study in Singapore. *Int J Gynaecol*  
5 *Obstet* 2018; 4(1): 31-37.
- 6  
7  
8 10. Pickering TG, Hall JE, Appel LJ, Falkner BE, Graves J, Hill MN, *et al.*  
9  
10 Recommendations for blood pressure measurement in humans and experimental  
11 animals. *Circulation* 2005; 111:697-716.
- 12  
13  
14 11. Brown MA, Lindheimer MD, de Swiet M, Van Assche A, Moutquin JM. The  
15 classification and diagnosis of the hypertensive disorders of pregnancy: statement  
16 from the International Society for the Study of Hypertension in Pregnancy  
17 (ISSHP). *Hypertens Pregnancy* 2001; 20(1): IX-XIV.
- 18  
19  
20  
21  
22 12. Whelton PK, Carey RM, Aronow WS, Casey DE Jr, Collins KJ, Dennison  
23 Himmelfarb C, *et al.* 2017 ACC/AHA/AAPA/ABC/ACPM/AGS/APhA/ASH/  
24 ASPC/NMA/PCNA Guideline for the Prevention, Detection, Evaluation, and  
25 Management of High Blood Pressure in Adults: Executive Summary: A Report of  
26 the American College of Cardiology/American Heart Association Task Force on  
27 Clinical Practice Guidelines. *Hypertension* 2018;71(6):1269-1324.
- 28  
29  
30  
31  
32 13. Bartsch E, Medcalf KE, Park AL, Ray JG; High Risk of Pre-eclampsia  
33 Identification Group. Clinical risk factors for pre-eclampsia determined in early  
34 pregnancy: systematic review and meta-analysis of large cohort studies. *BMJ*  
35 2016;353: i1753.
- 36  
37  
38  
39  
40 14. Rajakumar A, Michael HM, Rajakumar PA, Shibata E, Hubel CA, Karumanchi  
41 SA, *et al.* Extra-placental expression of vascular endothelial growth factor  
42 receptor-1, (Flt-1) and soluble Flt-1 (sFlt-1), by peripheral blood mononuclear  
43 cells (PBMCs) in normotensive and preeclamptic pregnant women. *Placenta*  
44 2005;26(7):563-73.
- 45  
46  
47  
48  
49 15. Freeman DJ, McManus F, Brown EA, Cherry L, Norrie J, Ramsay JE, *et al.*  
50 Short- and long-term changes in plasma inflammatory markers associated with  
51 preeclampsia. *Hypertension* 2004;44(5):708-14.
- 52  
53  
54  
55  
56 16. Dinh QN, Drummond GR, Sobey CG, Chrissobolis S. Roles of inflammation,  
57 oxidative stress, and vascular dysfunction in hypertension. *Biomed Res Int* 2014;  
58  
59  
60



- 
- 2014: 406960.
17. De Falco S. The discovery of placenta growth factor and its biological activity. *Exp Mol Med* 2012;44(1):1-9.
18. McElrath TF, Lim KH, Pare E, Rich-Edwards J, Pucci D, Troisi R, *et al.* Longitudinal evaluation of predictive value for preeclampsia of circulating angiogenic factors through pregnancy. *Am J Obstet Gynecol* 2012;207(5): 407.e1-7.
19. Powers RW, Roberts JM, Plymire DA, Pucci D, Datwyler SA, Laird DM, *et al.* Low placental growth factor across pregnancy identifies a subset of women with preterm preeclampsia: type 1 versus type 2 preeclampsia? *Hypertension* 2012;60(1):239-46.
20. Romero R, Nien JK, Espinoza J, Todem D, Fu W, Chung H, *et al.* A longitudinal study of angiogenic (placental growth factor) and anti-angiogenic (soluble endoglin and soluble vascular endothelial growth factor receptor-1) factors in normal pregnancy and patients destined to develop preeclampsia and deliver a small for gestational age neonate. *J Matern Fetal Neonatal Med* 2008;21(1):9-23.
21. Chaiworapongsa T, Romero R, Whitten AE, Korzeniewski SJ, Chaemsaitong P, Hernandez-Andrade E, *et al.* The use of angiogenic biomarkers in maternal blood to identify which SGA fetuses will require a preterm delivery and mothers who will develop pre-eclampsia. *J Matern Fetal Neonatal Med* 2016;29(8):1214-28.
22. Nelson DB, Ziadie MS, McIntire DD, Rogers BB, Leveno KJ. Placental pathology suggesting that preeclampsia is more than one disease. *Am J Obstet Gynecol* 2014;210(1): 66.e1-7.
23. Burton GJ, Jauniaux E. Pathophysiology of placental-derived fetal growth restriction. *Am J Obstet Gynecol*. 2018;218(2S): S745-S761.
24. Steegers EA, von Dadelszen P, Duvekot JJ, Pijnenborg R. Pre-eclampsia. *Lancet* 2010;376(9741):631-44.
25. Redman CW, Sargent IL, Staff AC. IFPA Senior Award Lecture: making sense of pre-eclampsia - two placental causes of preeclampsia? *Placenta* 2014;35 Suppl:

---

S20-5.

26. Ness RB, Roberts JM. Heterogeneous causes constituting the single syndrome of preeclampsia: a hypothesis and its implications. *Am J Obstet Gynecol* 1996;175(5):1365-70.

For peer review only

---

**Figure legends**

Figure 1. Flowchart of participants.

For peer review only

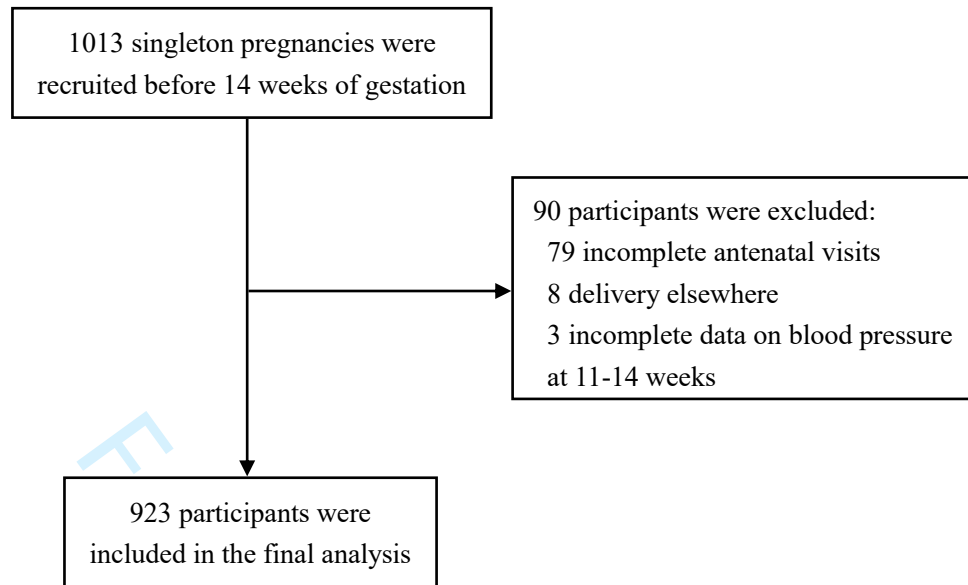

Supplementary table 1. Associations of maternal blood pressure at 11-14 weeks with serum angiogenic factors levels during pregnancy.

| Variable                             | Time points     | Log sFlt-1          |                | Log PIGF              |                | Log sFlt-1/ PIGF ratio |                |
|--------------------------------------|-----------------|---------------------|----------------|-----------------------|----------------|------------------------|----------------|
|                                      |                 | $\beta$ (95% CI) *  | <i>P</i> value | $\beta$ (95% CI) *    | <i>P</i> value | $\beta$ (95% CI) *     | <i>P</i> value |
| Systolic blood pressure<br>(10mmHg)  | 11-14 weeks     | 0.01 (0.004, 0.03)  | 0.009          | -0.01 (-0.02, 0.0004) | 0.057          | 0.03 (0.01, 0.04)      | < 0.001        |
|                                      | 18-22 weeks     | 0.01 (-0.01, 0.02)  | 0.227          | -0.02 (-0.03, -0.004) | 0.011          | 0.02 (0.01, 0.04)      | 0.003          |
|                                      | 28-32 weeks     | 0.01 (-0.001, 0.02) | 0.068          | -0.02 (-0.04, -0.002) | 0.031          | 0.03 (0.01, 0.06)      | 0.007          |
|                                      | $\geq 34$ weeks | 0.02 (0.01, 0.03)   | 0.009          | -0.02 (-0.05, 0.001)  | 0.059          | 0.04 (0.01, 0.07)      | 0.011          |
| Diastolic blood pressure<br>(10mmHg) | 11-14 weeks     | 0.02 (0.01, 0.04)   | 0.002          | -0.01 (-0.03, 0.001)  | 0.069          | 0.04 (0.02, 0.05)      | < 0.001        |
|                                      | 18-22 weeks     | 0.02 (0.004, 0.04)  | 0.014          | -0.01 (-0.02, 0.01)   | 0.388          | 0.03 (0.01, 0.05)      | 0.008          |
|                                      | 28-32 weeks     | 0.04 (0.02, 0.05)   | < 0.001        | -0.02 (-0.04, 0.004)  | 0.104          | 0.05 (0.03, 0.08)      | < 0.001        |
|                                      | $\geq 34$ weeks | 0.04 (0.02, 0.06)   | < 0.001        | -0.02 (-0.05, 0.01)   | 0.134          | 0.06 (0.02, 0.10)      | 0.003          |
| Mean arterial pressure<br>(10mmHg)   | 11-14 weeks     | 0.02 (0.01, 0.04)   | 0.002          | -0.02 (-0.03, -0.001) | 0.043          | 0.04 (0.02, 0.06)      | < 0.001        |
|                                      | 18-22 weeks     | 0.02 (0.001, 0.03)  | 0.044          | -0.01 (-0.02, 0.01)   | 0.506          | 0.02 (0.002, 0.04)     | 0.030          |
|                                      | 28-32 weeks     | 0.03 (0.01, 0.04)   | 0.001          | -0.02 (-0.05, 0.001)  | 0.058          | 0.05 (0.02, 0.08)      | 0.001          |
|                                      | $\geq 34$ weeks | 0.04 (0.02, 0.05)   | < 0.001        | -0.03 (-0.06, -0.003) | 0.029          | 0.07 (0.03, 0.11)      | < 0.001        |

Abbreviations: CI, confidence interval.

\*Adjusted for maternal race, smoking during pregnancy, maternal body mass index at blood test and gestational weeks at blood test.

# BMJ Open

## Angiogenic Factors during Pregnancy in Asian Women with Elevated Blood Pressure in Early Pregnancy and the Risk of Preeclampsia: a longitudinal cohort study

|                                 |                                                                                                                                                                                                                                                                                                                                                                                                                                                                                                                                                                                                                                                     |
|---------------------------------|-----------------------------------------------------------------------------------------------------------------------------------------------------------------------------------------------------------------------------------------------------------------------------------------------------------------------------------------------------------------------------------------------------------------------------------------------------------------------------------------------------------------------------------------------------------------------------------------------------------------------------------------------------|
| Journal:                        | <i>BMJ Open</i>                                                                                                                                                                                                                                                                                                                                                                                                                                                                                                                                                                                                                                     |
| Manuscript ID                   | bmjopen-2019-032237.R1                                                                                                                                                                                                                                                                                                                                                                                                                                                                                                                                                                                                                              |
| Article Type:                   | Original research                                                                                                                                                                                                                                                                                                                                                                                                                                                                                                                                                                                                                                   |
| Date Submitted by the Author:   | 18-Sep-2019                                                                                                                                                                                                                                                                                                                                                                                                                                                                                                                                                                                                                                         |
| Complete List of Authors:       | Zhu, Jing; MOE-Shanghai Key Laboratory of Children's Environmental Health, Xinhua Hospital, Shanghai Jiao Tong University School of Medicine, Shanghai, China<br>Zhang, Jun; Ministry of Education-Shanghai Key Laboratory of Children's Environmental Health, Xinhua Hospital, Shanghai Jiao Tong University School of Medicine<br>Ng, Mor Jack; KK Women's and Children's Hospital, Division of Obstetrics and Gynaecology<br>Chern, Bernard; KK Women's and Children's Hospital<br>Yeo, George S. H.; KK Women's and Children's Hospital, Singapore<br>Tan, Kok Hian; KK Women's and Children's Hospital, Division of Obstetrics and Gynaecology |
| <b>Primary Subject Heading</b>: | Obstetrics and gynaecology                                                                                                                                                                                                                                                                                                                                                                                                                                                                                                                                                                                                                          |
| Secondary Subject Heading:      | Epidemiology                                                                                                                                                                                                                                                                                                                                                                                                                                                                                                                                                                                                                                        |
| Keywords:                       | blood pressure, soluble fms-like tyrosine kinase 1, placental growth factor, preeclampsia                                                                                                                                                                                                                                                                                                                                                                                                                                                                                                                                                           |
|                                 |                                                                                                                                                                                                                                                                                                                                                                                                                                                                                                                                                                                                                                                     |

SCHOLARONE™  
Manuscripts

---

1                   **Angiogenic Factors during Pregnancy in Asian Women with Elevated Blood**  
2                   **Pressure in Early Pregnancy and the Risk of Preeclampsia:**  
3                   **a longitudinal cohort study**

4  
5                   Jing Zhu,<sup>1</sup> Jun Zhang,<sup>1,2</sup> Mor Jack Ng,<sup>2</sup> Bernard Chern,<sup>2</sup> George SH Yeo,<sup>3</sup>  
6                   Kok Hian Tan <sup>2</sup>

7  
8                   <sup>1</sup>MOE-Shanghai Key Laboratory of Children's Environmental Health, Xinhua  
9                   Hospital, Shanghai Jiao Tong University School of Medicine, Shanghai, China

10                  <sup>2</sup>Division of Obstetrics and Gynaecology, KK Women's and Children's Hospital,  
11                  Singapore

12                  <sup>3</sup>Department of Maternal and Fetal Medicine, KK Women's and Children's Hospital,  
13                  Singapore

14  
15                  **Corresponding Author:** Dr. Jun Zhang

16                  Xinhua Hospital, Shanghai Jiao Tong University School of Medicine

17                  No. 1665 Kongjiang Road, Shanghai, 200092, China

18                  Telephone: 86-21-25078871

19                  E-mail: junjimzhang@sina.com; zhangjun@xinquamed.com.cn

20  
21                  **Word count:** abstract 262; main text 2525

22                  **Number of tables:** 4

23                  **Number of figures:** 1

---

## 1 **Abstract**

### 2 **Objective**

3 It remains unclear what roles placenta-originated angiogenic factors play in the  
4 pathogenesis of preeclampsia among hypertensive women. We compared maternal  
5 soluble fms-like tyrosine kinase 1 (sFlt-1) and placental growth factor (PlGF) levels  
6 throughout pregnancy in women with normal blood pressure (BP), elevated BP and  
7 hypertension in early pregnancy and their risks of developing preeclampsia.

### 8 **Design**

9 A prospective cohort study.

### 10 **Setting**

11 KK Women's and Children's Hospital, Singapore.

### 12 **Participants**

13 923 women with singleton pregnancy less than 14 weeks of gestation were included  
14 in the prospective Neonatal and Obstetrics Risks Assessment cohort between  
15 September 2010 and October 2014. Systolic, diastolic, mean arterial blood pressure  
16 (MAP) were measured at 11-14 weeks.

### 17 **Primary and secondary outcomes**

18 Maternal serum sFlt-1, PlGF and sFlt-1/PlGF ratio were tested at 11-14 weeks, 18-22  
19 weeks, 28-32 weeks and 34 weeks onwards of gestation. Preeclampsia was main  
20 pregnancy outcome.

### 21 **Results**

22 Women were divided based on their BP in early pregnancy: normal (N=750), elevated  
23 BP (N=98) and hypertension (N=75). Maternal sFlt-1 levels and sFlt-1/PlGF ratios



1  
2  
3  
4 1 were higher in hypertensive women throughout pregnancy, but maternal PIGF levels  
5  
6  
7 2 were not significantly lower. Rise in maternal systolic, diastolic BP and MAP at 11-  
8  
9  
10 3 14 weeks were significantly associated with higher sFlt-1/PIGF ratios during  
11  
12 4 pregnancy. A 10mmHg increase in MAP was associated with a 5.6-fold increase in  
13  
14 5 risk of preterm preeclampsia and a 3.3-fold increase in risk of term preeclampsia,  
15  
16 6 respectively.

### 7 **Conclusion**

8 Women with elevated blood pressure in early pregnancy already had a higher sFlt-  
9  
10 1/PIGF ratio in early gestation and throughout pregnancy, and an increased risk of  
11  
12 10 preeclampsia. In contrast, PIGF levels in these women remained normal.  
13  
14  
15  
16  
17  
18

### 14 **Key words**

15 blood pressure, soluble fms-like tyrosine kinase 1, placental growth factor,  
16  
17 preeclampsia  
18

---

## 1 Strengths and limitations of the study

- 2 ● This study was based on a well-performed perspective cohort with  
3 comprehensive information on clinical, biophysical and biochemical markers.
- 4 ● Covariance analysis was performed to compare differences of angiogenic factors  
5 values among groups; multivariable logistic regression analysis was performed to  
6 evaluate the association between early pregnancy blood pressure and pregnancy  
7 outcomes.
- 8 ● Given that most of our participants were low-risk pregnant women, our results  
9 may not be applicable to high-risk women.

---

## 1 Introduction

2 The imbalance in placenta-originated angiogenic factors has been found to play an  
3 important role in the pathogenesis of preeclampsia in recent years. Soluble fms-like  
4 tyrosine kinase 1 (sFlt-1) and placental growth factor (PlGF) are the most studied  
5 proteins. sFlt-1, a splice variant of the vascular endothelial growth factor (VEGF)  
6 receptor Flt-1, is a circulating anti-angiogenic protein that inhibits proangiogenic  
7 factors-VEGF and placental growth factor (PlGF) signaling in the vasculature.<sup>1</sup> High  
8 levels of circulating sFlt-1 and low levels of PlGF were observed in women with  
9 established preeclampsia and even before the onset of clinical symptoms.<sup>2,3</sup> These  
10 promising findings have been adopted and recommended by the National Institute for  
11 Clinical Excellence (NICE) to rule out preeclampsia in women presenting with  
12 clinical suspicion.<sup>4</sup>

13  
14 Numerous studies focused on the pathological effects of excess sFlt-1 on endothelial  
15 function. It was observed that overexpression of sFlt-1 produced a preeclampsia-like  
16 syndrome of hypertension, proteinuria and glomerular endotheliosis in experimental  
17 animals.<sup>5</sup> sFlt-1 is largely produced by syncytiotrophoblast and secreted into maternal  
18 circulation.<sup>6</sup> Placental hypoxia may be one of the main triggers of inducing abundant  
19 sFlt-1 expression and leading to hypertensive complications.<sup>7,8</sup> However, this  
20 hypothesis may not totally explain why women with elevated blood pressure before  
21 pregnancy have a substantially higher risk of preeclampsia. Besides, evidence  
22 suggests that there might be some racial differences in maternal angiogenic and anti-

1 angiogenic factors.<sup>9</sup> Thus, the objective of this study is to examine the dynamic  
2 changes of angiogenic and anti-angiogenic factors throughout pregnancy in Asian  
3 women with elevated blood pressure in early gestation and their risks of developing  
4 preeclampsia later in pregnancy.

## 6 **Methods**

### 7 **Study design**

8 The Neonatal and Obstetrics Risks Assessment (NORA) study was a prospective  
9 cohort conducted at the KK Women's and Children's Hospital (KKH) in Singapore.<sup>10</sup>  
10 The cohort was set up to screen factors associated with adverse perinatal outcomes,  
11 with a focus on using clinical, biochemical and biophysical markers to predict the  
12 risks of pregnancy complications in early pregnancy. In brief, detailed interviews,  
13 ultrasound scans and blood sample collections were performed at recruitment (11 to  
14 14 weeks), 18 to 22 weeks, 28 to 32 weeks and 34 weeks onward, respectively. All 4  
15 antenatal visits also included measurement of maternal height and weight; recording  
16 of blood pressure by validated automated devices according to the recommendations  
17 of the American Heart Association.<sup>11</sup> Participants were closely followed up till their  
18 postnatal discharge from the hospital. Information on pregnancy complications, labor  
19 and delivery and neonatal outcomes was collected through medical chart review. The  
20 study protocol was approved by the SingHealth Centralised Institutional Review  
21 Board Ethics Committee, Singapore (CIRB Ref No. 2010/214/D), and a written  
22 informed consent was obtained from all participating women.

1

---

## 2 **Study population**

3 The NORA cohort recruited women with confirmed singleton pregnancies less than  
4 14 weeks of gestation between September 2010 and October 2014. The exclusion  
5 criteria were multiple gestation, severe medical conditions such as chronic renal  
6 disease or systemic lupus erythematosus and pregnancies complicated by aneuploidy  
7 or fetal anomaly. Gestational age was confirmed by ultrasound at recruitment. A total  
8 of 1013 women were enrolled and 934 of them completed all 4 antenatal visits. 8  
9 participants were delivered elsewhere, leaving 926 eligible women in the cohort. To  
10 evaluate the impacts of maternal blood pressure in early pregnancy on angiogenic  
11 factors levels and pregnancy outcomes, we used blood pressure at recruitment (11-14  
12 weeks) to classify women into normal, elevated and hypertension groups. As 3  
13 women did not have blood pressure records at recruitment (11-14 weeks), we  
14 included 923 participants for the final analysis (Figure 1).

15

## 16 **Diagnosis**

17 Preeclampsia was defined according to the guidelines of International Society for the  
18 Study of Hypertension in Pregnancy <sup>12</sup>: systolic blood pressure (SBP)  $\geq 140$  mmHg  
19 and/or diastolic blood pressure (DBP)  $\geq 90$  mmHg on at least two occasions four hours  
20 apart after 20 weeks of gestation in a previously normotensive women, and  
21 proteinuria: urinary albumin  $\geq 300$ mg/24 hours urine collection or  $\geq 1+$  dipstick. We  
22 used the gestational age at delivery to divide cases of preeclampsia into term ( $\geq 37$

1 weeks) and preterm term (< 37 weeks). Gestational hypertension was defined as  
2 newly onset hypertension after 20 weeks of gestation without proteinuria. Chronic  
3 hypertension was defined as women with history of hypertension before conception or  
4 the presence of hypertension before 20 weeks of gestation.

5  
6 To explore the relationship between maternal blood pressure levels in the first  
7 trimester and pregnancy outcome, we followed the 2017 guideline from the American  
8 College of Cardiology and the American Heart Association (ACC/AHA).<sup>13</sup> Normal  
9 blood pressure was defined as SBP < 120 mmHg and DBP < 80 mmHg; elevated  
10 blood pressure was defined as SBP 120-129 mmHg and DBP < 80 mmHg;  
11 hypertension stage 1 as SBP 130-139 mmHg or DBP 80-89 mmHg and hypertension  
12 stage 2 as SBP ≥ 140 mmHg or DBP ≥ 90 mmHg.

### 14 **Measurement of blood pressure**

15 Blood pressure was taken by validated automated devices which were calibrated  
16 periodically. The women were in the seated position and their arms were supported. A  
17 correct cuff size was used and the middle of cuff was positioned on woman's upper  
18 arm at the level of the right atrium. After a five-minute rest, blood pressure was  
19 measured by trained nurses and three recordings were made at 1-minute intervals. We  
20 calculated SBP and DBP as the average of the three measurements. Mean arterial  
21 pressure (MAP) was calculated from SBP and DBP measures using the following  
22 formula:  $MAP = DBP + 1/3 \times (SBP - DBP)$ . Blood pressure was modeled continuously in

1 units of 10 mm of mercury (mmHg).

2

### 3 **Measurements of angiogenic factors**

4 About 8 ml of maternal venous blood was collected in non-heparinised tubes at each  
5 antenatal visit. It was then centrifuged at 2000rpm for 15 minutes before separating  
6 and storing serum samples at -80°C for subsequent analysis. Serum levels of sFlt-1  
7 and PlGF were determined by means of the fully automated Elecsys assays on an  
8 electrochemiluminescence immunoassay platform (cobas e411 analyzers, Roche  
9 Diagnostics). The detection limit was approximately 6 pg/ml for sFlt-1 and <2 pg/ml  
10 for PlGF.

### 12 **Statistical analysis**

13 Normality of continuous variables was assessed by the Kolmogorov-Smirnov test.  
14 Numeric data were expressed as mean (standard deviation) or as median (interquartile  
15 range) for normally and non-normally distributed data, respectively. Maternal  
16 characteristics, pregnancy outcomes and maternal blood pressure levels were  
17 compared among normal, elevated blood pressure and hypertension (stage 1 and stage  
18 2) groups using one-way ANOVA or Kruskal-Wallis tests for continuous variables  
19 and  $\chi^2$  analysis for categorical variables. Covariance analysis and Dunnett test was  
20 used to compare differences of logarithm-transformed angiogenic factors values  
21 among groups adjusted for covariants. Geometric means and 95% confidence  
22 intervals were calculated by taking the exponent of the logarithm transformed mean.

1  
2  
3  
4 1 Linear regression analysis was performed to assess the association of blood pressure  
5  
6  
7 2 (10 mmHg) at recruitment with logarithm-transformed angiogenic factors values  
8  
9  
10 3 during pregnancy. Covariance analysis and linear regression models were adjusted for  
11  
12 4 maternal race, smoking during pregnancy, body mass index (BMI) and gestational age  
13  
14 5 at blood collection as covariant. Logistic regression analysis was performed to  
15  
16  
17 6 evaluate the association between early pregnancy blood pressure (10 mmHg) and  
18  
19  
20 7 pregnancy outcomes with adjustment of potential confounders, including maternal  
21  
22 8 age, race, education, maternal BMI at recruitment, chronic hypertension and  
23  
24  
25 9 preexisting diabetes mellitus. We used SAS version 9.4 (Cary, NC) for all statistical  
26  
27  
28 10 analyses.  
29

### 30 31 32 33 12 **Patient and public involvement**

34  
35 13 Patients and the public were not directly involved in the design, conduct or reporting  
36  
37  
38 14 in our study.  
39

### 40 41 42 43 16 **Results**

44  
45 17 A total of 923 participants in the NORA cohort were included in this analysis. Based  
46  
47  
48 18 on maternal blood pressure at recruitment at 11-14 weeks of gestation, 750 women  
49  
50  
51 19 were classified as normal blood pressure; 98 women as elevated blood pressure, and  
52  
53  
54 20 75 women as hypertension (stage 1 and stage 2). A comparison of maternal  
55  
56  
57 21 characteristics and pregnancy outcomes are given in Table 1. Women with  
58  
59  
60 22 hypertension (stage 1 and stage 2) in the first trimester were slightly older than the



1 other two groups. Chinese women contributed a greater proportion of hypertension  
 2 (49.3%) than Indian (8.0%) and Malay (30.7%). A higher incidence of maternal  
 3 overweight (BMI  $\geq 25$  kg/m<sup>2</sup>) and obesity (BMI  $\geq 30$  kg/m<sup>2</sup>) was observed in the  
 4 elevated blood pressure group and hypertension group than in the normal blood  
 5 pressure group.

6  
 7 Table 1. Characteristics and pregnancy outcomes by maternal blood pressure at 11-14weeks in the  
 8 NORA cohort.

| Variables                                                            | Normal BP<br>(n=750) | Elevated BP<br>(n=98) | Hypertension<br>(stage 1 and stage2)<br>(n=75) | P value |
|----------------------------------------------------------------------|----------------------|-----------------------|------------------------------------------------|---------|
| Maternal age (year), median (IQR)                                    | 30.0 (26.0-34.0)     | 30.0 (26.0-35.0)      | 32.0 (29.0-35.0)                               | < 0.001 |
| Race, n (%)                                                          |                      |                       |                                                | 0.012   |
| Chinese                                                              | 393 (52.3)           | 38 (38.8)             | 37 (49.3)                                      |         |
| Indian                                                               | 88 (11.7)            | 6 (6.1)               | 6 (8.0)                                        |         |
| Malay                                                                | 186 (24.8)           | 41 (41.8)             | 23 (30.7)                                      |         |
| Others                                                               | 84 (11.2)            | 13 (13.3)             | 9 (12.0)                                       |         |
| Parity, n (%)                                                        |                      |                       |                                                | 0.091   |
| 0                                                                    | 419 (55.9)           | 49 (50.0)             | 33 (44.0)                                      |         |
| 1                                                                    | 236 (31.5)           | 32 (32.7)             | 25 (33.3)                                      |         |
| $\geq 2$                                                             | 95 (12.7)            | 17 (17.3)             | 17 (22.7)                                      |         |
| Maternal education levels, n (%)                                     |                      |                       |                                                | 0.044   |
| Less than high school                                                | 166 (22.2)           | 28 (28.6)             | 25 (33.3)                                      |         |
| High school                                                          | 299 (40.0)           | 44 (44.9)             | 23 (30.7)                                      |         |
| College and above                                                    | 282 (37.8)           | 26 (26.5)             | 27 (36.0)                                      |         |
| Married, n (%)                                                       | 699 (93.2)           | 90 (91.8)             | 72 (96.0)                                      | 0.544   |
| Smoking during pregnancy, n (%)                                      | 19 (2.5)             | 4 (4.1)               | 0 (0)                                          | 0.230   |
| Maternal BMI at 11-14 weeks of gestation (kg/m <sup>2</sup> ), n (%) |                      |                       |                                                | < 0.001 |
| < 18.5                                                               | 62 (8.3)             | 2 (2.0)               | 0 (0)                                          |         |
| 18.5-24.9                                                            | 475 (63.5)           | 32 (32.7)             | 16 (21.3)                                      |         |
| 25.0-29.9                                                            | 162 (21.7)           | 35 (35.7)             | 32 (42.7)                                      |         |
| $\geq 30.0$                                                          | 49 (6.6)             | 29 (29.6)             | 27 (36.0)                                      |         |

|                                    |                  |                  |                  |         |
|------------------------------------|------------------|------------------|------------------|---------|
| Diabetes mellitus, n (%)           | 7 (0.9)          | 2 (2.0)          | 5 (6.7)          | < 0.001 |
| ART conception, n (%)              | 31 (4.1)         | 4 (4.1)          | 2 (2.7)          | 0.826   |
| Antihypertensive medication, n (%) | 0 (0)            | 0 (0)            | 3 (4.0)          | < 0.001 |
| Pregnancy outcomes                 |                  |                  |                  |         |
| Delivery age (weeks), median (IQR) | 39.0 (38.1-39.7) | 38.7 (38.0-39.6) | 38.3 (37.6-39.1) | 0.001   |
| Birth weight (kg), median (IQR)    | 3.1 (2.9-3.4)    | 3.1 (2.9-3.5)    | 3.1 (2.8-3.4)    | 0.324   |
| Gestational hypertension, n (%)    | 10 (1.3)         | 3 (3.1)          | 5 (6.7)          | 0.004   |
| Preeclampsia, n (%)                | 6 (0.8)          | 3 (3.1)          | 12 (16.0)        | < 0.001 |
| Preterm preeclampsia, n (%)        | 4 (0.5)          | 0 (0)            | 5 (6.7)          | < 0.001 |
| Term preeclampsia, n (%)           | 2 (0.3)          | 3 (3.1)          | 7 (9.3)          | < 0.001 |

IQR: interquartile range; BMI: body mass index; ART: assisted reproductive technology; BP: blood pressure.

The prevalence of maternal preconception diabetes was 6.7% in hypertension groups which was significantly higher than that of the other two groups. However, the prevalence of conception with assisted reproductive technology (ART) were not significantly different among the three groups. As expected, the incidence of gestational hypertension (6.7%), preeclampsia (16.0%), preterm preeclampsia (6.7%) and term preeclampsia (9.3%) were the highest in the hypertension group. Women with hypertension had sustainable higher blood pressure levels during pregnancy (Table 2).

Table 2. Maternal blood pressure levels at 4 time points during pregnancy by maternal blood pressure at 11-14weeks in the NORA cohort.

| Variables | Normal BP<br>(n=750) | Elevated BP<br>(n=98) | Hypertension<br>(stage 1 and stage2)<br>(n=75) | P value |
|-----------|----------------------|-----------------------|------------------------------------------------|---------|
|-----------|----------------------|-----------------------|------------------------------------------------|---------|

SBP (mmHg), mean±SD

|                     |            |            |            |         |
|---------------------|------------|------------|------------|---------|
| 11-14 weeks         | 104.9±8.3  | 123.2±2.6  | 126.8±11.1 | < 0.001 |
| 18-22 weeks         | 105.9±10.1 | 118.6±9.9  | 124.0±10.5 | < 0.001 |
| 28-32 weeks         | 108.2±10.0 | 118.1±9.7  | 123.8±11.4 | < 0.001 |
| ≥34 weeks           | 110.5±10.7 | 119.5±10.6 | 126.1±15.5 | < 0.001 |
| DBP (mmHg), mean±SD |            |            |            |         |
| 11-14 weeks         | 63.6±6.8   | 71.4±4.4   | 80.8±7.0   | < 0.001 |
| 18-22 weeks         | 62.9±7.0   | 69.0±7.2   | 76.3±8.1   | < 0.001 |
| 28-32 weeks         | 64.0±6.9   | 69.8±6.6   | 76.6±9.0   | < 0.001 |
| ≥34 weeks           | 67.4±7.8   | 73.3±7.3   | 80.0±11.4  | < 0.001 |
| MAP (mmHg), mean±SD |            |            |            |         |
| 11-14 weeks         | 77.3±6.5   | 88.7±3.2   | 96.1±6.5   | < 0.001 |
| 18-22 weeks         | 77.2±7.2   | 85.5±7.3   | 92.2±8.2   | < 0.001 |
| 28-32 weeks         | 78.8±7.1   | 85.9±6.3   | 92.4±9.1   | < 0.001 |
| ≥34 weeks           | 81.8±8.1   | 88.7±7.6   | 95.4±11.9  | < 0.001 |

1 BP: blood pressure; SD: standard deviation; SBP: systolic blood pressure; DBP: diastolic blood  
 2 pressure; MAP: mean arterial pressure

3

4 Table 3 shows the values of angiogenic factors at 4 time points in the NORA  
 5 participants. We used covariance analysis to control for potential confounders that  
 6 were reported to have impact on serum angiogenic proteins levels, including maternal  
 7 race, smoking, maternal BMI and gestational age at blood collection. Overall, serum  
 8 sFlt-1 concentrations continued rising throughout pregnancy. PlGF levels increased  
 9 from the first trimester, peaked at 28-32 weeks and declined afterwards.

1  
2  
3  
4 1 Consequently, high levels of sFlt-1/PlGF ratio were observed both at 11-14 weeks and  
5  
6  
7 2 34 weeks onwards. The dynamic change of serum angiogenic factors during  
8  
9  
10 3 pregnancy was observed in all 3 groups. Maternal serum sFlt-1 and PlGF levels were  
11  
12 4 not significantly different between elevated BP group and normal BP group at 4 time  
13  
14 5 points during pregnancy. In hypertension group, a trend of higher maternal sFlt-1  
15  
16 6 concentrations was observed from early pregnancy and it was dramatically increased  
17  
18 7 during the third trimester compared with sFlt-1 levels in normotensive women. In  
19  
20 8 contrast, PlGF concentrations were not significantly different between hypertension  
21  
22 9 group and normal BP group. Thus, sFlt-1/PlGF ratio in hypertensive women was  
23  
24  
25  
26  
27 10 significantly higher throughout pregnancy than that in normotensive women.  
28  
29  
30  
31  
32  
33  
34  
35  
36  
37  
38  
39  
40  
41  
42  
43  
44  
45  
46  
47  
48  
49  
50  
51  
52  
53  
54  
55  
56  
57  
58  
59  
60

Table 3. Maternal serum angiogenic factors levels at 4 time points during pregnancy by maternal blood pressure at 11-14weeks in the NORA cohort.

| Angiogenic factors | Time points | Normal BP |                   | Elevated BP |                   |           | Hypertension (stage 1 and stage 2) |                   |           |
|--------------------|-------------|-----------|-------------------|-------------|-------------------|-----------|------------------------------------|-------------------|-----------|
|                    |             | N         | mean (95%CI) *    | N           | mean (95%CI) *    | P value † | N                                  | mean (95%CI) *    | P value ‡ |
| sFlt-1 (pg/ml)     | 11-14 weeks | 746       | 1585 (1549, 1622) | 98          | 1722 (1585, 1862) | 0.096     | 75                                 | 1758 (1585, 1950) | 0.079     |
|                    | 18-22 weeks | 745       | 1698 (1660, 1778) | 98          | 1738 (1585, 1950) | 0.824     | 75                                 | 1905 (1698, 2138) | 0.139     |
|                    | 28-32 weeks | 730       | 1660 (1585, 1698) | 92          | 1698 (1549, 1862) | 0.868     | 70                                 | 2042 (1820, 2291) | 0.001     |
|                    | ≥34 weeks   | 659       | 2570 (2512, 2692) | 82          | 2818 (2570, 3162) | 0.201     | 57                                 | 3311 (2951, 3802) | 0.000     |
| PlGF (pg/ml)       | 11-14 weeks | 746       | 37 (36, 38)       | 98          | 35 (32, 38)       | 0.243     | 75                                 | 35 (32, 39)       | 0.593     |
|                    | 18-22 weeks | 745       | 269 (257, 275)    | 98          | 245 (224, 269)    | 0.261     | 75                                 | 245 (219, 275)    | 0.364     |
|                    | 28-32 weeks | 730       | 617 (589, 646)    | 92          | 575 (501, 676)    | 0.718     | 70                                 | 537 (457, 631)    | 0.270     |
|                    | ≥34 weeks   | 659       | 380 (355, 398)    | 82          | 324 (269, 380)    | 0.178     | 57                                 | 339 (275, 427)    | 0.585     |
| sFlt-1/ PlGF ratio | 11-14 weeks | 746       | 42.7 (40.7, 44.7) | 98          | 50.1 (44.7, 55.0) | 0.013     | 75                                 | 50.1 (43.7, 56.2) | 0.042     |
|                    | 18-22 weeks | 745       | 6.5 (6.2, 6.8)    | 98          | 7.1 (6.3, 7.9)    | 0.201     | 75                                 | 7.8 (6.8, 8.9)    | 0.027     |
|                    | 28-32 weeks | 730       | 2.7 (2.5, 2.9)    | 92          | 2.9 (2.5, 3.5)    | 0.643     | 70                                 | 3.8 (3.1, 4.6)    | 0.005     |
|                    | ≥34 weeks   | 659       | 6.9 (6.3, 7.4)    | 82          | 8.9 (6.9, 11.2)   | 0.100     | 57                                 | 9.8 (7.4, 13.2)   | 0.044     |

BP, blood pressure; CI, confidence interval.

\*Means (95%CI) are adjusted for maternal race, smoking during pregnancy, maternal body mass index at blood test and gestational weeks at blood test from models with logarithm-transformed serum angiogenic factors levels as outcomes; presented as geometric means.

†statistically significant difference between normal BP and elevated BP groups.

‡statistically significant difference between normal BP and hypertension group.

1 Higher levels of DBP and MAP in early pregnancy were significantly associated with  
2 higher log-transformed sFlt-1 values throughout pregnancy. Meanwhile, higher SBP  
3 levels were significantly associated with lower log-transformed PlGF levels both at  
4 18-22 weeks ( $\beta = -0.02$  per 10 mmHg SBP,  $P = 0.011$ ) and at 28-32 weeks ( $\beta = -0.02$   
5 per 10 mmHg SBP,  $P = 0.031$ ). Thus, rises in maternal SBP, DBP and MAP in the first  
6 trimester were significantly associated with higher sFlt-1/PlGF ratios during  
7 pregnancy (supplementary table 1).

8  
9 Table 4 presents the significant association between blood pressure in early pregnancy  
10 and risks of preeclampsia (OR 2.5, 95% CI 1.5-4.0 per 10 mmHg SBP; OR 4.3, 95%  
11 CI 2.3-7.9 per 10 mmHg DBP; OR 4.1, 95% CI 2.2-7.7 per 10 mmHg MAP,  
12 respectively) after adjustment of potential confounders. Preterm preeclampsia was  
13 more closely associated with higher DBP than SBP (OR 6.0, 95% CI 2.3-7.9 per 10  
14 mmHg DBP vs. OR 1.9, 95% CI 0.9-3.8 per 10 mmHg SBP).

1  
2  
3  
4  
5 1 Table 4. Logistic regression analysis for maternal blood pressure at 11-14weeks and adverse pregnancy outcomes.

| Variable     | Preeclampsia     |                  | Preterm preeclampsia |                   | Term preeclampsia |                  |
|--------------|------------------|------------------|----------------------|-------------------|-------------------|------------------|
|              | Crude OR         | Adjusted OR*     | Crude OR             | Adjusted OR*      | Crude OR          | Adjusted OR*     |
|              | (95% CI)         | (95% CI)         | (95% CI)             | (95% CI)          | (95% CI)          | (95% CI)         |
| SBP (10mmHg) | 3.0 (1.9, 4.6) † | 2.5 (1.5, 4.0) † | 1.9 (1.1, 3.5)       | 1.9 (0.9, 3.8)    | 4.1 (2.2, 7.8) †  | 3.2 (1.6, 6.4) † |
| DBP (10mmHg) | 5.2 (2.9, 9.3) † | 4.3 (2.3, 7.9) † | 5.8 (2.4, 14.4) †    | 6.0 (2.3, 16.2) † | 4.4 (2.1, 9.1) †  | 3.1 (1.4, 6.8) † |
| MAP (10mmHg) | 5.1 (2.8, 9.0) † | 4.1 (2.2, 7.7) † | 5.1 (2.1, 11.9) †    | 5.6 (2.0, 15.5) † | 4.7 (2.2, 9.7) †  | 3.3 (1.5, 7.4) † |

15 2 OR, odds ratio; CI, confidence interval; SBP: systolic blood pressure; DBP: diastolic blood pressure; MAP: mean arterial pressure

16 3 \*Adjusted for maternal age, race, education, maternal body mass index at 11-14 weeks gestation and diabetes mellitus.

17 4 †P < 0.01.

18 5

19 6

---

## 1 Discussion

2 Our study confirmed that higher early pregnancy blood pressure levels were  
3 prospectively associated with increased risks of preeclampsia, including preterm and  
4 term preeclampsia. Furthermore, women with elevated blood pressure in early  
5 pregnancy already had a higher sFlt-1 level and sFlt-1/PlGF ratio in early gestation  
6 and throughout pregnancy. In contrast, PlGF levels in these women remained normal  
7 throughout gestation.

8  
9 It is well established that women with chronic hypertension have several times the  
10 risk of preeclampsia than normotensive women.<sup>14</sup> However, the pathogenesis is poorly  
11 understood and what role these angiogenic and anti-angiogenic factors play remains  
12 unclear. Although syncytiotrophoblast is a major source of sFlt-1 production,  
13 peripheral blood monocytes produce a small amount of sFlt-1 further stimulated by  
14 inflammation.<sup>15,16</sup> As chronic hypertension is often related to a chronic inflammatory  
15 status,<sup>17</sup> the slightly increased sFlt-1 level in hypertensive women in early pregnancy,  
16 as observed in our study, may reflect the chronic inflammatory status in early  
17 pregnancy. Our results showed that hypertensive women in early pregnancy might  
18 have an imbalanced angiogenic factors levels and such imbalanced angiogenic  
19 environment tended to continue during pregnancy, which might be associated with the  
20 increased risks of preeclampsia.

21  
22 On the other hand, maternal circulating PlGF is highly expressed by the placenta



1 during pregnancy. It has both vasculogenic and angiogenic functions<sup>18</sup> and its level is  
2 likely to reflect the placental health conditions. For example, low PIGF concentrations  
3 preceding clinical onset of preeclampsia often occur in early-onset rather than late-  
4 onset preeclampsia.<sup>19</sup> Women who develop preeclampsia with fetal growth restriction  
5 (FGR) have further decreased PIGF levels compared with women who develop  
6 preeclampsia without FGR.<sup>20-22</sup> Early-onset preeclampsia and placenta-derived FGR  
7 are associated with placenta pathology such as incomplete remodeling of spiral  
8 arteries, acute atherosclerosis and thrombosis in spiral arteries and syncytiotrophoblast  
9 necrosis.<sup>23,24</sup> In our study, women with elevated blood pressure in early pregnancy,  
10 the PIGF level remained by and large normal throughout pregnancy and newborn's  
11 birth weight was not significantly different among the three groups. Thus, our  
12 findings seem to suggest that the placental implantation and development might not  
13 be impaired in these women.

14  
15 As poor placentation is not a unique cause of developing preeclampsia, enhanced  
16 placental oxidative and endoplasmic reticulum stress and increased maternal systemic  
17 inflammatory responses are thought to play crucial roles in preeclampsia as well.<sup>25,26</sup>  
18 Thus, preexisting endothelial dysfunction in hypertensive women could be  
19 exacerbated as a result of physiological burden of pregnancy even without an  
20 abnormal placentation.<sup>27</sup> Taking all things considered, we propose that the imbalanced  
21 angiogenic factors environment and, perhaps more importantly, preexisting  
22 endothelial susceptibility and dysfunction, may play a critical role in the development

1 of preeclampsia in women with elevated blood pressure in early pregnancy.

2

3 To our best knowledge, this was the first prospective cohort study that illustrated the  
4 dynamic changes of angiogenic and anti-angiogenic factors throughout pregnancy in  
5 women with different blood pressure status in early pregnancy. The NORA cohort  
6 was a well-performed prospective study with comprehensive information including  
7 clinical, biophysical and biochemical markers. The follow-up rate was 99.1%  
8 (926/934) at the end of pregnancy. Measurements of blood pressure and serum  
9 angiogenic factors were performed according to standardized protocols. In our study,  
10 three women reported using antihypertensive medications during pregnancy; thus, the  
11 results should not be affected by the medication issue. On the other hand, as most of  
12 our participants were low-risk pregnant women, our results may not be applicable to  
13 high-risk women. As it was an observational study, the potential residual confounding  
14 and selection bias might have some impacts on our results.

15

## 16 **Conclusion**

17 Women with elevated blood pressure in early pregnancy already had a higher sFlt-  
18 1/PlGF ratio in early gestation and throughout pregnancy, and an increased risk of  
19 preeclampsia. In contrast, PlGF levels in these women remained normal throughout  
20 gestation. Our findings suggest that the imbalanced angiogenic factors levels  
21 throughout gestation might play a crucial role in developing preeclampsia in women  
22 with preexisting elevated blood pressure. Our study also supports that preconception

---

1 or early pregnancy high blood pressure, defined as SBP $\geq$ 130 mmHg or DBP $\geq$ 80  
2 mmHg according to 2017 ACC/AHA guideline, should cause clinical awareness both  
3 during pregnancy and in their later life.  
4  
5

For peer review only

---

## 1 **Acknowledgments**

2 We thank all the NORA cohort (Neonatal and Obstetrics Risks Assessment)  
3 participants for their commitment to the study, the NORA cohort investigators and  
4 staff.

## 5 **Author Contributions**

6 JZ: performed the statistical analysis, searched literature and drafted the manuscript. JZ  
7 (corresponding author): had the original idea, provided guidance for the statistical  
8 analysis and revised the manuscript. MJN, BC, GSY and KHT: participated in the data  
9 collection, reviewed and revised the manuscript.

10 **Funding:** The authors received no financial support for the research, authorship, and/or  
11 publication of this article.

12 **Competing interests:** None declared.

13 **Patient consent for publication:** Obtained.

14 **Ethics approval:** This study was approved by the SingHealth Centralised Institutional  
15 Review Board Ethics Committee, Singapore (CIRB Ref No. 2010/214/D).

16 **Provenance and peer review:** Not commissioned; externally peer reviewed.

17 **Data availability statement:** All data relevant to the study are included in the article  
18 or uploaded as supplementary information.

19

---

## References

1. Kendall RL, Thomas KA. Inhibition of vascular endothelial cell growth factor activity by an endogenously encoded soluble receptor. *Proc Natl Acad Sci U S A* 1993; 90:10705-10709.
2. Levine RJ, Maynard SE, Qian C, Lim KH, England LJ, Yu KF, *et al*. Circulating angiogenic factors and the risk of preeclampsia. *N Engl J Med* 2004; 350(7): 672-83.
3. Zeisler H, Llurba E, Chantraine F, Vatish M, Staff AC, Sennström M, *et al*. Predictive Value of the sFlt-1: PlGF Ratio in Women with Suspected Preeclampsia. *N Engl J Med* 2016 Jan 7;374(1):13-22.
4. NICE. PlGF-based Testing to Help Diagnose Suspected Pre-eclampsia (Triage PlGF Test, Elecsys Immunoassay sFlt-1/PlGF Ratio, DELFIA Xpress PlGF 1-2-3 Test, and BRAHMS sFlt-1 Kryptor/BRAHMS PlGF plus Kryptor PE ratio). Diagnostics Guidance 23. London: NICE, 2016.
5. Maynard SE, Min JY, Merchan J, Lim KH, Li J, Mondal S, *et al*. Excess placental soluble fms-like tyrosine kinase 1 (sFlt1) may contribute to endothelial dysfunction, hypertension, and proteinuria in preeclampsia. *J Clin Invest* 2003;111(5):649-58.
6. Sela S, Itin A, Natanson-Yaron S, Greenfield C, Goldman-Wohl D, Yagel S, *et al*. A novel human-specific soluble vascular endothelial growth factor receptor 1: cell-type-specific splicing and implications to vascular endothelial growth factor homeostasis and preeclampsia. *Circ Res* 2008;102(12):1566-74.
7. Gerber HP, Condorelli F, Park J, Ferrara N. Differential transcriptional regulation of the two vascular endothelial growth factor receptor genes. Flt-1, but not Flk-1/KDR, is up-regulated by hypoxia. *J Biol Chem* 1997;272(38):23659-67.
8. Warrington JP, George EM, Palei AC, Spradley FT, Granger JP. Recent advances in the understanding of the pathophysiology of preeclampsia. *Hypertension* 2013;62(4):666-73.
9. Yang J, Pearl M, DeLorenze GN, Romero R, Dong Z, Jelliffe-Pawlowski L, *et al*.

- 
- 1 Racial-ethnic differences in midtrimester maternal serum levels of angiogenic and  
2 antiangiogenic factors. *Am J Obstet Gynecol.* 2016; 215(3): 359.e1-9.
- 3 10. Ng QJ, Zhang J, Dai F, Ng MJ, Razali NS, Win NM, *et al.* Neonatal and Obstetric  
4 Risk Assessment (NORA) Pregnancy Cohort Study in Singapore. *Int J Gynaecol*  
5 *Obstet* 2018; 4(1): 31-37.
- 6 11. Pickering TG, Hall JE, Appel LJ, Falkner BE, Graves J, Hill MN, *et al.*  
7 Recommendations for blood pressure measurement in humans and experimental  
8 animals. *Circulation* 2005; 111:697-716.
- 9 12. Brown MA, Lindheimer MD, de Swiet M, Van Assche A, Moutquin JM. The  
10 classification and diagnosis of the hypertensive disorders of pregnancy: statement  
11 from the International Society for the Study of Hypertension in Pregnancy  
12 (ISSHP). *Hypertens Pregnancy* 2001; 20(1): IX-XIV.
- 13 13. Whelton PK, Carey RM, Aronow WS, Casey DE Jr, Collins KJ, Dennison  
14 Himmelfarb C, *et al.* 2017 ACC/AHA/AAPA/ABC/ACPM/AGS/APhA/ASH/  
15 ASPC/NMA/PCNA Guideline for the Prevention, Detection, Evaluation, and  
16 Management of High Blood Pressure in Adults: Executive Summary: A Report of  
17 the American College of Cardiology/American Heart Association Task Force on  
18 Clinical Practice Guidelines. *Hypertension* 2018;71(6):1269-1324.
- 19 14. Bartsch E, Medcalf KE, Park AL, Ray JG; High Risk of Pre-eclampsia  
20 Identification Group. Clinical risk factors for pre-eclampsia determined in early  
21 pregnancy: systematic review and meta-analysis of large cohort studies. *BMJ*  
22 2016;353: i1753.
- 23 15. Rajakumar A, Michael HM, Rajakumar PA, Shibata E, Hubel CA, Karumanchi  
24 SA, *et al.* Extra-placental expression of vascular endothelial growth factor  
25 receptor-1, (Flt-1) and soluble Flt-1 (sFlt-1), by peripheral blood mononuclear  
26 cells (PBMCs) in normotensive and preeclamptic pregnant women. *Placenta*  
27 2005;26(7):563-73.
- 28 16. Freeman DJ, McManus F, Brown EA, Cherry L, Norrie J, Ramsay JE, *et al.*  
29 Short- and long-term changes in plasma inflammatory markers associated with

- 
- 1 preeclampsia. *Hypertension* 2004;44(5):708-14.
- 2 17. Dinh QN, Drummond GR, Sobey CG, Chrissobolis S. Roles of inflammation,  
3 oxidative stress, and vascular dysfunction in hypertension. *Biomed Res Int* 2014;  
4 2014: 406960.
- 5 18. De Falco S. The discovery of placenta growth factor and its biological activity.  
6 *Exp Mol Med* 2012;44(1):1-9.
- 7 19. McElrath TF, Lim KH, Pare E, Rich-Edwards J, Pucci D, Troisi R, *et al.*  
8 Longitudinal evaluation of predictive value for preeclampsia of circulating  
9 angiogenic factors through pregnancy. *Am J Obstet Gynecol* 2012;207(5): 407.e1-  
10 7.
- 11 20. Powers RW, Roberts JM, Plymire DA, Pucci D, Datwyler SA, Laird DM, *et al.*  
12 Low placental growth factor across pregnancy identifies a subset of women with  
13 preterm preeclampsia: type 1 versus type 2 preeclampsia? *Hypertension*  
14 2012;60(1):239-46.
- 15 21. Romero R, Nien JK, Espinoza J, Todem D, Fu W, Chung H, *et al.* A longitudinal  
16 study of angiogenic (placental growth factor) and anti-angiogenic (soluble  
17 endoglin and soluble vascular endothelial growth factor receptor-1) factors in  
18 normal pregnancy and patients destined to develop preeclampsia and deliver a  
19 small for gestational age neonate. *J Matern Fetal Neonatal Med* 2008;21(1):9-23.
- 20 22. Chaiworapongsa T, Romero R, Whitten AE, Korzeniewski SJ, Chaemsaitong P,  
21 Hernandez-Andrade E, *et al.* The use of angiogenic biomarkers in maternal blood  
22 to identify which SGA fetuses will require a preterm delivery and mothers who  
23 will develop pre-eclampsia. *J Matern Fetal Neonatal Med* 2016;29(8):1214-28.
- 24 23. Nelson DB, Ziadie MS, McIntire DD, Rogers BB, Leveno KJ. Placental pathology  
25 suggesting that preeclampsia is more than one disease. *Am J Obstet Gynecol*  
26 2014;210(1): 66.e1-7.
- 27 24. Burton GJ, Jauniaux E. Pathophysiology of placental-derived fetal  
28 growth restriction. *Am J Obstet Gynecol*. 2018;218(2S): S745-S761.
- 29 25. Steegers EA, von Dadelszen P, Duvekot JJ, Pijnenborg R. Pre-eclampsia. *Lancet*

1  
2  
3  
4 1 2010;376(9741):631-44.

5  
6 2 26. Redman CW, Sargent IL, Staff AC. IFPA Senior Award Lecture: making sense of  
7  
8 3 pre-eclampsia - two placental causes of preeclampsia? *Placenta* 2014;35 Suppl:  
9  
10 4 S20-5.

11  
12 5 27. Ness RB, Roberts JM. Heterogeneous causes constituting the single syndrome of  
13  
14 6 preeclampsia: a hypothesis and its implications. *Am J Obstet Gynecol*  
15  
16 7 1996;175(5):1365-70.

17  
18 8

19  
20  
21 9  
22  
23  
24  
25  
26  
27  
28  
29  
30  
31  
32  
33  
34  
35  
36  
37  
38  
39  
40  
41  
42  
43  
44  
45  
46  
47  
48  
49  
50  
51  
52  
53  
54  
55  
56  
57  
58  
59  
60



1  
2  
3  
4  
5  
6  
7  
8  
9  
10  
11  
12  
13  
14  
15  
16  
17  
18  
19  
20  
21  
22  
23  
24  
25  
26  
27  
28  
29  
30  
31  
32  
33  
34  
35  
36  
37  
38  
39  
40  
41  
42  
43  
44  
45  
46  
47  
48  
49  
50  
51  
52  
53  
54  
55  
56  
57  
58  
59  
60

---

1 **Figure legends**

2 Figure 1. Flowchart of participants.

3

For peer review only



Supplementary table 1. Associations of maternal blood pressure at 11-14weeks with serum angiogenic factors levels during pregnancy.

| Variable                             | Time points     | Log sFlt-1          |                | Log PIGF              |                | Log sFlt-1/ PIGF ratio |                |
|--------------------------------------|-----------------|---------------------|----------------|-----------------------|----------------|------------------------|----------------|
|                                      |                 | $\beta$ (95% CI) *  | <i>P</i> value | $\beta$ (95% CI) *    | <i>P</i> value | $\beta$ (95% CI) *     | <i>P</i> value |
| Systolic blood pressure<br>(10mmHg)  | 11-14 weeks     | 0.01 (0.004, 0.03)  | 0.009          | -0.01 (-0.02, 0.0004) | 0.057          | 0.03 (0.01, 0.04)      | < 0.001        |
|                                      | 18-22 weeks     | 0.01 (-0.01, 0.02)  | 0.227          | -0.02 (-0.03, -0.004) | 0.011          | 0.02 (0.01, 0.04)      | 0.003          |
|                                      | 28-32 weeks     | 0.01 (-0.001, 0.02) | 0.068          | -0.02 (-0.04, -0.002) | 0.031          | 0.03 (0.01, 0.06)      | 0.007          |
|                                      | $\geq$ 34 weeks | 0.02 (0.01, 0.03)   | 0.009          | -0.02 (-0.05, 0.001)  | 0.059          | 0.04 (0.01, 0.07)      | 0.011          |
| Diastolic blood pressure<br>(10mmHg) | 11-14 weeks     | 0.02 (0.01, 0.04)   | 0.002          | -0.01 (-0.03, 0.001)  | 0.069          | 0.04 (0.02, 0.05)      | < 0.001        |
|                                      | 18-22 weeks     | 0.02 (0.004, 0.04)  | 0.014          | -0.01 (-0.02, 0.01)   | 0.388          | 0.03 (0.01, 0.05)      | 0.008          |
|                                      | 28-32 weeks     | 0.04 (0.02, 0.05)   | < 0.001        | -0.02 (-0.04, 0.004)  | 0.104          | 0.05 (0.03, 0.08)      | < 0.001        |
|                                      | $\geq$ 34 weeks | 0.04 (0.02, 0.06)   | < 0.001        | -0.02 (-0.05, 0.01)   | 0.134          | 0.06 (0.02, 0.10)      | 0.003          |
| Mean arterial pressure<br>(10mmHg)   | 11-14 weeks     | 0.02 (0.01, 0.04)   | 0.002          | -0.02 (-0.03, -0.001) | 0.043          | 0.04 (0.02, 0.06)      | < 0.001        |
|                                      | 18-22 weeks     | 0.02 (0.001, 0.03)  | 0.044          | -0.01 (-0.02, 0.01)   | 0.506          | 0.02 (0.002, 0.04)     | 0.030          |
|                                      | 28-32 weeks     | 0.03 (0.01, 0.04)   | 0.001          | -0.02 (-0.05, 0.001)  | 0.058          | 0.05 (0.02, 0.08)      | 0.001          |
|                                      | $\geq$ 34 weeks | 0.04 (0.02, 0.05)   | < 0.001        | -0.03 (-0.06, -0.003) | 0.029          | 0.07 (0.03, 0.11)      | < 0.001        |

Abbreviations: CI, confidence interval.

\*Adjusted for maternal race, smoking during pregnancy, maternal body mass index at blood test and gestational weeks at blood test.

Supplementary table 2. Maternal serum angiogenic factors levels during pregnancy by preeclampsia in women with different BP status in early pregnancy.

| Angiogenic factors | Time points | Normal BP            |                      |                | Elevated BP          |                      |                | Hypertension (stage 1 and stage 2) |                      |                |
|--------------------|-------------|----------------------|----------------------|----------------|----------------------|----------------------|----------------|------------------------------------|----------------------|----------------|
|                    |             | PE                   | Non-PE               | <i>P</i> value | PE                   | Non-PE               | <i>P</i> value | PE                                 | Non-PE               | <i>P</i> value |
|                    |             | (n=6)                | (n=744)              |                | (n=3)                | (n=95)               |                | (n=12)                             | (n=63)               |                |
|                    |             | mean                 | mean                 |                | mean                 | mean                 |                | mean                               | mean                 |                |
|                    |             | (95%CI) *            | (95%CI) *            |                | (95%CI) *            | (95%CI) *            |                | (95%CI) *                          | (95%CI) *            |                |
| sFlt-1 (pg/ml)     | 11-14 weeks | 1514 (1096, 2089)    | 1622 (1549, 1660)    | 0.718          | 1778 (1096, 2884)    | 1622 (1514, 1778)    | 0.756          | 1349 (1122, 1622)                  | 1660 (1549, 1820)    | 0.048          |
|                    | 18-22 weeks | 1698 (1175, 2512)    | 1738 (1660, 1778)    | 0.925          | 1479 (813, 2692)     | 1660 (1514, 1862)    | 0.692          | 1738 (1288, 2291)                  | 1738 (1514, 1995)    | 0.960          |
|                    | 28-32 weeks | 3090 (2188, 4365)    | 1698 (1622, 1738)    | <0.001         | 1995 (1148, 3467)    | 1549 (1413, 1698)    | 0.388          | 3020 (2188, 4074)                  | 1622 (1445, 1862)    | <0.001         |
|                    | ≥34 weeks   | 6026 (3548, 10233)   | 2630 (2512, 2692)    | 0.002          | 3715 (2042, 6607)    | 2692 (2399, 2951)    | 0.295          | 6026 (3802, 9550)                  | 2951 (2570, 3388)    | 0.005          |
| PlGF (pg/ml)       | 11-14 weeks | 29.5 (21.4, 41.7)    | 37.2 (36.3, 38.0)    | 0.199          | 32.4 (20.0, 53.7)    | 36.3 (33.1, 38.9)    | 0.716          | 24.6 (19.1, 30.9)                  | 35.5 (32.4, 39.8)    | 0.005          |
|                    | 18-22 weeks | 208.9 (144.5, 309.0) | 269.2 (263.0, 281.8) | 0.191          | 182.0 (114.8, 288.4) | 239.9 (218.8, 257.0) | 0.257          | 151.4 (120.2, 190.6)               | 234.4 (213.8, 263.0) | 0.001          |
|                    | 28-32 weeks | 269.2 (158.5, 457.1) | 631.0 (602.6, 660.7) | 0.002          | 323.6 (166.0, 645.7) | 562.3 (501.2, 645.7) | 0.118          | 182.0 (120.2, 269.2)               | 588.8 (489.8, 691.8) | <0.001         |
|                    | ≥34 weeks   | 169.8 (67.6, 426.6)  | 380.2 (363.1, 407.4) | 0.083          | 208.9 (85.1, 512.9)  | 316.2 (269.2, 371.5) | 0.372          | 147.9 (66.1, 323.6)                | 323.6 (257.0, 416.9) | 0.059          |
| sFlt-1/ PlGF ratio | 11-14 weeks | 50.1 (33.1, 77.6)    | 42.7 (41.7, 44.7)    | 0.454          | 53.7 (28.8, 100.0)   | 45.7 (40.7, 50.1)    | 0.591          | 56.2 (42.7, 74.1)                  | 46.8 (41.7, 52.5)    | 0.235          |

1  
2  
3  
4  
5  
6  
7  
8  
9  
10  
11  
12  
13  
14  
15  
16  
17  
18  
19  
20  
21  
22  
23  
24  
25  
26  
27  
28  
29  
30  
31  
32  
33  
34  
35  
36  
37  
38  
39  
40  
41  
42  
43  
44  
45  
46

|             |      |             |            |        |      |            |             |       |      |             |             |        |
|-------------|------|-------------|------------|--------|------|------------|-------------|-------|------|-------------|-------------|--------|
| 18-22 weeks | 8.1  | (5.0, 6.5)  | (6.2, 6.6) | 0.323  | 8.1  | (4.2, 7.1) | (6.3, 7.9)  | 0.674 | 11.2 | (7.9, 7.4)  | (6.3, 8.5)  | 0.029  |
|             |      | 12.9)       |            |        |      | 15.9)      |             |       |      | 16.2)       |             |        |
| 28-32 weeks | 11.5 | (6.0, 2.7)  | (2.5, 2.8) | <0.001 | 6.0  | (2.4, 2.8) | (2.4, 3.2)  | 0.093 | 16.6 | (9.8, 2.8)  | (2.2, 3.6)  | <0.001 |
|             |      | 21.9)       |            |        |      | 15.1)      |             |       |      | 28.2)       |             |        |
| ≥34 weeks   | 35.5 | (10.5, 6.8) | (6.3, 7.4) | 0.008  | 17.8 | (4.9, 8.5) | (6.8, 10.7) | 0.269 | 40.7 | (14.5, 9.1) | (6.6, 12.6) | 0.008  |
|             |      | 120.2)      |            |        |      | 64.6)      |             |       |      | 114.8)      |             |        |

BP, blood pressure; CI, confidence interval; PE, preeclampsia.

\*Means (95%CI) are adjusted for maternal race, smoking during pregnancy, maternal body mass index at blood test and gestational weeks at blood test from models with logarithm-transformed serum angiogenic factors levels as outcomes; presented as geometric means.

Supplementary table 3. Logarithm-transformed maternal serum angiogenic factors levels at 4 time points during pregnancy by maternal blood pressure at 11-14weeks in the NORA cohort.

| Angiogenic factors | Time points | Normal BP |                   | Elevated BP |                   |                            |           | Hypertension (stage 1 and stage 2) |                   |                            |           |
|--------------------|-------------|-----------|-------------------|-------------|-------------------|----------------------------|-----------|------------------------------------|-------------------|----------------------------|-----------|
|                    |             | N         | mean (95%CI) *    | N           | mean (95%CI) *    | mean difference (95%CI) *† | P value † | N                                  | mean (95%CI) *    | mean difference (95%CI) *‡ | P value ‡ |
| sFlt-1 (pg/ml)     | 11-14 weeks | 746       | 3.20 (3.19, 3.21) | 98          | 3.24 (3.20, 3.27) | 0.04 (-0.01, 0.08)         | 0.096     | 75                                 | 3.24 (3.20, 3.29) | 0.05 (-0.01, 0.10)         | 0.079     |
|                    | 18-22 weeks | 745       | 3.23 (3.22, 3.25) | 98          | 3.24 (3.20, 3.29) | 0.01 (-0.04, 0.06)         | 0.824     | 75                                 | 3.28 (3.23, 3.33) | 0.05 (-0.01, 0.11)         | 0.139     |
|                    | 28-32 weeks | 730       | 3.22 (3.20, 3.23) | 92          | 3.23 (3.19, 3.27) | 0.01 (-0.04, 0.06)         | 0.868     | 70                                 | 3.31 (3.26, 3.36) | 0.09 (0.03, 0.15)          | 0.001     |
|                    | ≥34 weeks   | 659       | 3.41 (3.40, 3.43) | 82          | 3.45 (3.41, 3.50) | 0.04 (-0.02, 0.10)         | 0.201     | 57                                 | 3.52 (3.47, 3.58) | 0.11 (0.04, 0.17)          | 0.000     |
| PlGF (pg/ml)       | 11-14 weeks | 746       | 1.57 (1.56, 1.58) | 98          | 1.54 (1.50, 1.58) | -0.03 (-0.08, 0.01)        | 0.243     | 75                                 | 1.55 (1.50, 1.59) | -0.02 (-0.07, 0.03)        | 0.593     |
|                    | 18-22 weeks | 745       | 2.43 (2.41, 2.44) | 98          | 2.39 (2.35, 2.43) | -0.03 (-0.08, 0.02)        | 0.261     | 75                                 | 2.39 (2.34, 2.44) | -0.03 (-0.09, 0.03)        | 0.364     |
|                    | 28-32 weeks | 730       | 2.79 (2.77, 2.81) | 92          | 2.76 (2.70, 2.83) | -0.02 (-0.10, 0.05)        | 0.718     | 70                                 | 2.73 (2.66, 2.80) | -0.06 (-0.14, 0.03)        | 0.270     |
|                    | ≥34 weeks   | 659       | 2.58 (2.55, 2.60) | 82          | 2.51 (2.43, 2.58) | -0.07 (-0.17, 0.02)        | 0.178     | 57                                 | 2.53 (2.44, 2.63) | -0.05 (-0.16, 0.07)        | 0.585     |
| sFlt-1/ PlGF ratio | 11-14 weeks | 746       | 1.63 (1.61, 1.65) | 98          | 1.70 (1.65, 1.74) | 0.07 (0.01, 0.13)          | 0.013     | 75                                 | 1.70 (1.64, 1.75) | 0.07 (0.01, 0.13)          | 0.042     |
|                    | 18-22 weeks | 745       | 0.81 (0.79, 0.83) | 98          | 0.85 (0.80, 0.85) | 0.05 (-0.02, 0.11)         | 0.201     | 75                                 | 0.89 (0.83, 0.89) | 0.08 (0.01, 0.15)          | 0.027     |

1  
2  
3  
4  
5  
6  
7  
8  
9  
10  
11  
12  
13  
14  
15  
16  
17  
18  
19  
20  
21  
22  
23  
24  
25  
26  
27  
28  
29  
30  
31  
32  
33  
34  
35  
36  
37  
38  
39  
40  
41  
42  
43  
44  
45  
46

|  |             |     |                   |    |                   |                    |       |    |                   |                         |
|--|-------------|-----|-------------------|----|-------------------|--------------------|-------|----|-------------------|-------------------------|
|  |             |     |                   |    | 0.90)             |                    |       |    | 0.95)             |                         |
|  | 28-32 weeks | 730 | 0.43 (0.40, 0.46) | 92 | 0.46 (0.39, 0.54) | 0.03 (-0.06, 0.13) | 0.643 | 70 | 0.58 (0.49, 0.66) | 0.15 (0.04, 0.25) 0.005 |
|  | ≥ 34 weeks  | 659 | 0.84 (0.80, 0.87) | 82 | 0.95 (0.84, 1.05) | 0.11 (-0.02, 0.24) | 0.100 | 57 | 0.99 (0.87, 1.12) | 0.16 (0.01, 0.31) 0.044 |

BP, blood pressure; CI, confidence interval.

\*Means (95%CI) are adjusted for maternal race, smoking during pregnancy, maternal body mass index at blood test and gestational weeks at blood test from models with logarithm-transformed serum angiogenic factors levels as outcomes;

†statistically significant difference between normal BP and elevated BP groups.

‡statistically significant difference between normal BP and hypertension group.

STROBE Statement—Checklist of items that should be included in reports of *cohort studies*

|                           | Item No | Recommendation                                                                                                                                                                                    |                                   |
|---------------------------|---------|---------------------------------------------------------------------------------------------------------------------------------------------------------------------------------------------------|-----------------------------------|
| <b>Title and abstract</b> | 1       | (a) Indicate the study's design with a commonly used term in the title or the abstract                                                                                                            | Page 2, line 9                    |
|                           |         | (b) Provide in the abstract an informative and balanced summary of what was done and what was found                                                                                               | Page 2-3                          |
| <b>Introduction</b>       |         |                                                                                                                                                                                                   |                                   |
| Background/rationale      | 2       | Explain the scientific background and rationale for the investigation being reported                                                                                                              | Page 5, line 14-22                |
| Objectives                | 3       | State specific objectives, including any prespecified hypotheses                                                                                                                                  | Page 6, line 1-4                  |
| <b>Methods</b>            |         |                                                                                                                                                                                                   |                                   |
| Study design              | 4       | Present key elements of study design early in the paper                                                                                                                                           | Page 6, line 8-9                  |
| Setting                   | 5       | Describe the setting, locations, and relevant dates, including periods of recruitment, exposure, follow-up, and data collection                                                                   | Page 6, line 8-22                 |
| Participants              | 6       | (a) Give the eligibility criteria, and the sources and methods of selection of participants. Describe methods of follow-up                                                                        | Page 7, line 2-14                 |
|                           |         | (b) For matched studies, give matching criteria and number of exposed and unexposed                                                                                                               | NA                                |
| Variables                 | 7       | Clearly define all outcomes, exposures, predictors, potential confounders, and effect modifiers. Give diagnostic criteria, if applicable                                                          | Page 7, line 16 ~ Page 8, line 12 |
| Data sources/measurement  | 8*      | For each variable of interest, give sources of data and details of methods of assessment (measurement). Describe comparability of assessment methods if there is more than one group              | Page 8, line 14 ~ Page 9, line 10 |
| Bias                      | 9       | Describe any efforts to address potential sources of bias                                                                                                                                         | Page 7, line 4-7                  |
| Study size                | 10      | Explain how the study size was arrived at                                                                                                                                                         | Page 7, line 7-14                 |
| Quantitative variables    | 11      | Explain how quantitative variables were handled in the analyses. If applicable, describe which groupings were chosen and why                                                                      | Page 8, line 6-12                 |
| Statistical methods       | 12      | (a) Describe all statistical methods, including those used to control for confounding                                                                                                             | Page 9, line 12~ Page 10, line 10 |
|                           |         | (b) Describe any methods used to examine subgroups and interactions                                                                                                                               | NA                                |
|                           |         | (c) Explain how missing data were addressed                                                                                                                                                       | NA                                |
|                           |         | (d) If applicable, explain how loss to follow-up was addressed                                                                                                                                    | NA                                |
|                           |         | (e) Describe any sensitivity analyses                                                                                                                                                             | NA                                |
| <b>Results</b>            |         |                                                                                                                                                                                                   |                                   |
| Participants              | 13*     | (a) Report numbers of individuals at each stage of study—eg numbers potentially eligible, examined for eligibility, confirmed eligible, included in the study, completing follow-up, and analysed | Page 10, line 17-20               |
|                           |         | (b) Give reasons for non-participation at each stage                                                                                                                                              | Page 7,                           |



|                          |     |                                                                                                                                                                                                              |                                    |
|--------------------------|-----|--------------------------------------------------------------------------------------------------------------------------------------------------------------------------------------------------------------|------------------------------------|
|                          |     |                                                                                                                                                                                                              | line 8-9                           |
|                          |     | (c) Consider use of a flow diagram                                                                                                                                                                           | Page 7, figure 1                   |
| Descriptive data         | 14* | (a) Give characteristics of study participants (eg demographic, clinical, social) and information on exposures and potential confounders                                                                     | Page 11, Table 1                   |
|                          |     | (b) Indicate number of participants with missing data for each variable of interest                                                                                                                          | Page 15, Table 3                   |
|                          |     | (c) Summarise follow-up time (eg, average and total amount)                                                                                                                                                  | Page 15, Table 3                   |
| Outcome data             | 15* | Report numbers of outcome events or summary measures over time                                                                                                                                               | Page 15, Table 3                   |
| Main results             | 16  | (a) Give unadjusted estimates and, if applicable, confounder-adjusted estimates and their precision (eg, 95% confidence interval). Make clear which confounders were adjusted for and why they were included | Page 15, Table 3, Page 17, Table 4 |
|                          |     | (b) Report category boundaries when continuous variables were categorized                                                                                                                                    | NA                                 |
|                          |     | (c) If relevant, consider translating estimates of relative risk into absolute risk for a meaningful time period                                                                                             | NA                                 |
| Other analyses           | 17  | Report other analyses done—eg analyses of subgroups and interactions, and sensitivity analyses                                                                                                               | NA                                 |
| <b>Discussion</b>        |     |                                                                                                                                                                                                              |                                    |
| Key results              | 18  | Summarise key results with reference to study objectives                                                                                                                                                     | Page 18, line 2-7                  |
| Limitations              | 19  | Discuss limitations of the study, taking into account sources of potential bias or imprecision. Discuss both direction and magnitude of any potential bias                                                   | Page 20, line 9-14                 |
| Interpretation           | 20  | Give a cautious overall interpretation of results considering objectives, limitations, multiplicity of analyses, results from similar studies, and other relevant evidence                                   | Page 20, line 17-22                |
| Generalisability         | 21  | Discuss the generalisability (external validity) of the study results                                                                                                                                        | Page 20, line 11-13                |
| <b>Other information</b> |     |                                                                                                                                                                                                              |                                    |
| Funding                  | 22  | Give the source of funding and the role of the funders for the present study and, if applicable, for the original study on which the present article is based                                                | Page 22, Line 12-13                |

\*Give information separately for exposed and unexposed groups.

**Note:** An Explanation and Elaboration article discusses each checklist item and gives methodological background and published examples of transparent reporting. The STROBE checklist is best used in conjunction with this article (freely available on the Web sites of PLoS Medicine at <http://www.plosmedicine.org/>, Annals of Internal Medicine at <http://www.annals.org/>, and Epidemiology at <http://www.epidem.com/>). Information on the STROBE Initiative is available at <http://www.strobe-statement.org>.

# BMJ Open

## Angiogenic Factors during Pregnancy in Asian Women with Elevated Blood Pressure in Early Pregnancy and the Risk of Preeclampsia: a longitudinal cohort study

|                                 |                                                                                                                                                                                                                                                                                                                                                                                                                                                                                                                                                                                                                                                     |
|---------------------------------|-----------------------------------------------------------------------------------------------------------------------------------------------------------------------------------------------------------------------------------------------------------------------------------------------------------------------------------------------------------------------------------------------------------------------------------------------------------------------------------------------------------------------------------------------------------------------------------------------------------------------------------------------------|
| Journal:                        | <i>BMJ Open</i>                                                                                                                                                                                                                                                                                                                                                                                                                                                                                                                                                                                                                                     |
| Manuscript ID                   | bmjopen-2019-032237.R2                                                                                                                                                                                                                                                                                                                                                                                                                                                                                                                                                                                                                              |
| Article Type:                   | Original research                                                                                                                                                                                                                                                                                                                                                                                                                                                                                                                                                                                                                                   |
| Date Submitted by the Author:   | 04-Nov-2019                                                                                                                                                                                                                                                                                                                                                                                                                                                                                                                                                                                                                                         |
| Complete List of Authors:       | Zhu, Jing; MOE-Shanghai Key Laboratory of Children's Environmental Health, Xinhua Hospital, Shanghai Jiao Tong University School of Medicine, Shanghai, China<br>Zhang, Jun; Ministry of Education-Shanghai Key Laboratory of Children's Environmental Health, Xinhua Hospital, Shanghai Jiao Tong University School of Medicine<br>Ng, Mor Jack; KK Women's and Children's Hospital, Division of Obstetrics and Gynaecology<br>Chern, Bernard; KK Women's and Children's Hospital<br>Yeo, George S. H.; KK Women's and Children's Hospital, Singapore<br>Tan, Kok Hian; KK Women's and Children's Hospital, Division of Obstetrics and Gynaecology |
| <b>Primary Subject Heading</b>: | Obstetrics and gynaecology                                                                                                                                                                                                                                                                                                                                                                                                                                                                                                                                                                                                                          |
| Secondary Subject Heading:      | Epidemiology                                                                                                                                                                                                                                                                                                                                                                                                                                                                                                                                                                                                                                        |
| Keywords:                       | blood pressure, soluble fms-like tyrosine kinase 1, placental growth factor, preeclampsia                                                                                                                                                                                                                                                                                                                                                                                                                                                                                                                                                           |
|                                 |                                                                                                                                                                                                                                                                                                                                                                                                                                                                                                                                                                                                                                                     |

SCHOLARONE™  
Manuscripts

---

1                    **Angiogenic Factors during Pregnancy in Asian Women with Elevated Blood**  
2                    **Pressure in Early Pregnancy and the Risk of Preeclampsia:**  
3                    **a longitudinal cohort study**

4  
5                    Jing Zhu,<sup>1</sup> Jun Zhang,<sup>1,2</sup> Mor Jack Ng,<sup>2</sup> Bernard Chern,<sup>2</sup> George SH Yeo,<sup>3</sup>  
6                    Kok Hian Tan <sup>2</sup>

7  
8                    <sup>1</sup>MOE-Shanghai Key Laboratory of Children's Environmental Health, Xinhua  
9                    Hospital, Shanghai Jiao Tong University School of Medicine, Shanghai, China

10                    <sup>2</sup>Division of Obstetrics and Gynaecology, KK Women's and Children's Hospital,  
11                    Singapore

12                    <sup>3</sup>Department of Maternal and Fetal Medicine, KK Women's and Children's Hospital,  
13                    Singapore

14  
15                    **Corresponding Author:** Dr. Jun Zhang

16                    Xinhua Hospital, Shanghai Jiao Tong University School of Medicine

17                    No. 1665 Kongjiang Road, Shanghai, 200092, China

18                    Telephone: 86-21-25078871

19                    E-mail: junjimzhang@sina.com; zhangjun@xinquamed.com.cn

20  
21                    **Word count:** abstract 262; main text 2525

22                    **Number of tables:** 4

23                    **Number of figures:** 1

---

## 1 **Abstract**

### 2 **Objective**

3 It remains unclear what roles placenta-originated angiogenic factors play in the  
4 pathogenesis of preeclampsia among hypertensive women. We compared maternal  
5 soluble fms-like tyrosine kinase 1 (sFlt-1) and placental growth factor (PlGF) levels  
6 throughout pregnancy in women with normal blood pressure (BP), elevated BP and  
7 hypertension in early pregnancy and their risks of developing preeclampsia.

### 8 **Design**

9 A prospective cohort study.

### 10 **Setting**

11 KK Women's and Children's Hospital, Singapore.

### 12 **Participants**

13 923 women with singleton pregnancy less than 14 weeks of gestation were included  
14 in the prospective Neonatal and Obstetrics Risks Assessment cohort between  
15 September 2010 and October 2014. Systolic, diastolic, mean arterial blood pressure  
16 (MAP) were measured at 11-14 weeks.

### 17 **Primary and secondary outcomes**

18 Maternal serum sFlt-1, PlGF and sFlt-1/PlGF ratio were tested at 11-14 weeks, 18-22  
19 weeks, 28-32 weeks and 34 weeks onwards of gestation. Preeclampsia was main  
20 pregnancy outcome.

### 21 **Results**

22 Women were divided based on their BP in early pregnancy: normal (N=750), elevated  
23 BP (N=98) and hypertension (N=75). Maternal sFlt-1 levels and sFlt-1/PlGF ratios

1  
2  
3  
4 1 were higher in hypertensive women throughout pregnancy, but maternal PIGF levels  
5  
6  
7 2 were not significantly lower. Rise in maternal systolic, diastolic BP and MAP at 11-  
8  
9  
10 3 14 weeks were significantly associated with higher sFlt-1/PIGF ratios during  
11  
12 4 pregnancy. A 10mmHg increase in MAP was associated with a 5.6-fold increase in  
13  
14 5 risk of preterm preeclampsia and a 3.3-fold increase in risk of term preeclampsia,  
15  
16  
17 6 respectively.

### 7 **Conclusion**

8 Women with elevated blood pressure in early pregnancy already had a higher sFlt-  
9  
10 1/PIGF ratio in early gestation and throughout pregnancy, and an increased risk of  
11  
12  
13  
14  
15  
16  
17  
18  
19  
20  
21  
22  
23  
24  
25  
26  
27  
28 10 preeclampsia. In contrast, PIGF levels in these women remained normal.  
29  
30  
31  
32  
33  
34  
35  
36  
37  
38  
39  
40  
41  
42  
43  
44  
45  
46  
47  
48  
49  
50  
51  
52  
53  
54  
55  
56  
57  
58  
59  
60

### 14 **Key words**

15 blood pressure, soluble fms-like tyrosine kinase 1, placental growth factor,  
16  
17  
18  
19  
20  
21  
22  
23  
24  
25  
26  
27  
28  
29  
30  
31  
32  
33  
34  
35  
36  
37  
38  
39  
40  
41  
42  
43  
44  
45  
46  
47  
48  
49  
50  
51  
52  
53  
54  
55  
56  
57  
58  
59  
60

---

## 1 Strengths and limitations of the study

- 2 ● This study was based on a well-performed prospective cohort with  
3 comprehensive information on clinical, biophysical and biochemical markers.
- 4 ● Covariance analysis was performed to compare differences of angiogenic factors  
5 values among groups; multivariable logistic regression analysis was performed to  
6 evaluate the association between early pregnancy blood pressure and pregnancy  
7 outcomes.
- 8 ● Given that most of our participants were low-risk pregnant women, our results  
9 may not be applicable to high-risk women.

---

## 1 Introduction

2 The imbalance in placenta-originated angiogenic factors has been found to play an  
3 important role in the pathogenesis of preeclampsia in recent years. Soluble fms-like  
4 tyrosine kinase 1 (sFlt-1) and placental growth factor (PlGF) are the most studied  
5 proteins. sFlt-1, a splice variant of the vascular endothelial growth factor (VEGF)  
6 receptor Flt-1, is a circulating anti-angiogenic protein that inhibits proangiogenic  
7 factors-VEGF and placental growth factor (PlGF) signaling in the vasculature.<sup>1</sup> High  
8 levels of circulating sFlt-1 and low levels of PlGF were observed in women with  
9 established preeclampsia and even before the onset of clinical symptoms.<sup>2,3</sup> These  
10 promising findings have been adopted and recommended by the National Institute for  
11 Clinical Excellence (NICE) to rule out preeclampsia in women presenting with  
12 clinical suspicion.<sup>4</sup>

13  
14 Numerous studies focused on the pathological effects of excess sFlt-1 on endothelial  
15 function. It was observed that overexpression of sFlt-1 produced a preeclampsia-like  
16 syndrome of hypertension, proteinuria and glomerular endotheliosis in experimental  
17 animals.<sup>5</sup> sFlt-1 is largely produced by syncytiotrophoblast and secreted into maternal  
18 circulation.<sup>6</sup> Placental hypoxia may be one of the main triggers of inducing abundant  
19 sFlt-1 expression and leading to hypertensive complications.<sup>7,8</sup> However, this  
20 hypothesis may not totally explain why women with elevated blood pressure before  
21 pregnancy have a substantially higher risk of preeclampsia. Besides, evidence  
22 suggests that there might be some racial differences in maternal angiogenic and anti-

1 angiogenic factors.<sup>9</sup> Thus, the objective of this study was to examine the dynamic  
2 changes of angiogenic and anti-angiogenic factors throughout pregnancy in Asian  
3 women with elevated blood pressure in early gestation and their risks of developing  
4 preeclampsia later in pregnancy.

## 6 **Methods**

### 7 **Study design**

8 The Neonatal and Obstetrics Risks Assessment (NORA) study was a prospective  
9 cohort conducted at the KK Women's and Children's Hospital (KKH) in Singapore.<sup>10</sup>  
10 The cohort was set up to screen factors associated with adverse perinatal outcomes,  
11 with a focus on using clinical, biochemical and biophysical markers to predict the  
12 risks of pregnancy complications in early pregnancy. In brief, detailed interviews,  
13 ultrasound scans and blood sample collections were performed at recruitment (11 to  
14 14 weeks), 18 to 22 weeks, 28 to 32 weeks and 34 weeks onward, respectively. All 4  
15 antenatal visits also included measurement of maternal height and weight; recording  
16 of blood pressure by validated automated devices according to the recommendations  
17 of the American Heart Association.<sup>11</sup> Participants were closely followed up till their  
18 postnatal discharge from the hospital. Information on pregnancy complications, labor  
19 and delivery and neonatal outcomes was collected through medical chart review. The  
20 study protocol was approved by the SingHealth Centralised Institutional Review  
21 Board Ethics Committee, Singapore (CIRB Ref No. 2010/214/D), and a written  
22 informed consent was obtained from all participating women.



1

---

## 2 **Study population**

3 The NORA cohort recruited women with confirmed singleton pregnancies less than  
4 14 weeks of gestation between September 2010 and October 2014. The exclusion  
5 criteria were multiple gestation, severe medical conditions such as chronic renal  
6 disease or systemic lupus erythematosus and pregnancies complicated by aneuploidy  
7 or fetal anomaly. Gestational age was confirmed by ultrasound at recruitment. A total  
8 of 1013 women were enrolled and 934 of them completed all 4 antenatal visits. 8  
9 participants were delivered elsewhere, leaving 926 eligible women in the cohort. To  
10 evaluate the impacts of maternal blood pressure in early pregnancy on angiogenic  
11 factors levels and pregnancy outcomes, we used blood pressure at recruitment (11-14  
12 weeks) to classify women into normal, elevated and hypertension groups. As 3  
13 women did not have blood pressure records at recruitment (11-14 weeks), we  
14 included 923 participants for the final analysis (Figure 1).

15

## 16 **Diagnosis**

17 Preeclampsia was defined according to the guidelines of International Society for the  
18 Study of Hypertension in Pregnancy <sup>12</sup>: systolic blood pressure (SBP)  $\geq 140$  mmHg  
19 and/or diastolic blood pressure (DBP)  $\geq 90$  mmHg on at least two occasions four hours  
20 apart after 20 weeks of gestation in a previously normotensive women, and  
21 proteinuria: urinary albumin  $\geq 300$ mg/24 hours urine collection or  $\geq 1+$  dipstick. We  
22 used the gestational age at delivery to divide cases of preeclampsia into term ( $\geq 37$

1 weeks) and preterm term (< 37 weeks). Gestational hypertension was defined as  
2 newly onset hypertension after 20 weeks of gestation without proteinuria. Chronic  
3 hypertension was defined as women with history of hypertension before conception or  
4 the presence of hypertension before 20 weeks of gestation.

5  
6 To explore the relationship between maternal blood pressure levels in the first  
7 trimester and pregnancy outcome, we followed the 2017 guideline from the American  
8 College of Cardiology and the American Heart Association (ACC/AHA).<sup>13</sup> Normal  
9 blood pressure was defined as SBP < 120 mmHg and DBP < 80 mmHg; elevated  
10 blood pressure was defined as SBP 120-129 mmHg and DBP < 80 mmHg;  
11 hypertension stage 1 as SBP 130-139 mmHg or DBP 80-89 mmHg and hypertension  
12 stage 2 as SBP ≥ 140 mmHg or DBP ≥ 90 mmHg.

### 14 **Measurement of blood pressure**

15 Blood pressure was taken by validated automated devices which were calibrated  
16 periodically. The women were in the seated position and their arms were supported. A  
17 correct cuff size was used and the middle of cuff was positioned on woman's upper  
18 arm at the level of the right atrium. After a five-minute rest, blood pressure was  
19 measured by trained nurses and three recordings were made at 1-minute intervals. We  
20 calculated SBP and DBP as the average of the three measurements. Mean arterial  
21 pressure (MAP) was calculated from SBP and DBP measures using the following  
22 formula:  $MAP = DBP + 1/3 \times (SBP - DBP)$ . Blood pressure was modeled continuously in

1  
2  
3  
4 1 units of 10 mm of mercury (mmHg).  
5  
6

7 2  
8

### 9 3 **Measurements of angiogenic factors**

10 4 About 8 ml of maternal venous blood was collected in non-heparinised tubes at each  
11  
12 5 antenatal visit. It was then centrifuged at 2000rpm for 15 minutes before separating  
13  
14 6 and storing serum samples at -80°C for subsequent analysis. Serum levels of sFlt-1  
15  
16 7 and PlGF were determined by means of the fully automated Elecsys assays on an  
17  
18 8 electrochemiluminescence immunoassay platform (cobas e411 analyzers, Roche  
19  
20 9 Diagnostics). The detection limit was approximately 6 pg/ml for sFlt-1 and <2 pg/ml  
21  
22 10 for PlGF.  
23  
24  
25  
26  
27  
28  
29  
30  
31  
32

### 33 12 **Statistical analysis**

34  
35 13 Normality of continuous variables was assessed by the Kolmogorov-Smirnov test.  
36  
37 14 Numeric data were expressed as mean (standard deviation) or as median (interquartile  
38  
39 15 range) for normally and non-normally distributed data, respectively. Maternal  
40  
41 16 characteristics, pregnancy outcomes and maternal blood pressure levels were  
42  
43 17 compared among normal, elevated blood pressure and hypertension (stage 1 and stage  
44  
45 18 2) groups using one-way ANOVA or Kruskal-Wallis tests for continuous variables  
46  
47 19 and  $\chi^2$  analysis for categorical variables. Covariance analysis and Dunnett test was  
48  
49 20 used to compare differences of logarithm-transformed angiogenic factors values  
50  
51 21 among groups adjusted for covariants. Geometric means and 95% confidence  
52  
53 22 intervals were calculated by taking the exponent of the logarithm transformed mean.  
54  
55  
56  
57  
58  
59  
60

1  
2  
3  
4 1 Linear regression analysis was performed to assess the association of blood pressure  
5  
6  
7 2 (10 mmHg) at recruitment with logarithm-transformed angiogenic factors values  
8  
9  
10 3 during pregnancy. Covariance analysis and linear regression models were adjusted for  
11  
12 4 maternal race, smoking during pregnancy, body mass index (BMI) and gestational age  
13  
14 5 at blood collection as covariant. Logistic regression analysis was performed to  
15  
16  
17 6 evaluate the association between early pregnancy blood pressure (10 mmHg) and  
18  
19  
20 7 pregnancy outcomes with adjustment of potential confounders, including maternal  
21  
22 8 age, race, education, maternal BMI at recruitment, chronic hypertension and  
23  
24  
25 9 preexisting diabetes mellitus. We used SAS version 9.4 (Cary, NC) for all statistical  
26  
27  
28 10 analyses.  
29

### 30 31 32 33 12 **Patient and public involvement**

34  
35 13 Patients and the public were not directly involved in the design, conduct or reporting  
36  
37  
38 14 in our study.  
39

### 40 41 42 43 16 **Results**

44  
45 17 A total of 923 participants in the NORA cohort were included in this analysis. Based  
46  
47  
48 18 on maternal blood pressure at recruitment at 11-14 weeks of gestation, 750 women  
49  
50  
51 19 were classified as normal blood pressure; 98 women as elevated blood pressure, and  
52  
53  
54 20 75 women as hypertension (stage 1 and stage 2). A comparison of maternal  
55  
56  
57 21 characteristics and pregnancy outcomes are given in Table 1. Women with  
58  
59  
60 22 hypertension (stage 1 and stage 2) in the first trimester were slightly older than the

1 other two groups. Chinese women contributed a greater proportion of hypertension  
 2 (49.3%) than Indian (8.0%) and Malay (30.7%). A higher incidence of maternal  
 3 overweight (BMI  $\geq 25$  kg/m<sup>2</sup>) and obesity (BMI  $\geq 30$  kg/m<sup>2</sup>) was observed in the  
 4 elevated blood pressure group and hypertension group than in the normal blood  
 5 pressure group.

6  
 7 Table 1. Characteristics and pregnancy outcomes by maternal blood pressure at 11-14weeks in the  
 8 NORA cohort.

| Variables                                                            | Normal BP<br>(n=750) | Elevated BP<br>(n=98) | Hypertension<br>(stage 1 and stage2)<br>(n=75) | P value |
|----------------------------------------------------------------------|----------------------|-----------------------|------------------------------------------------|---------|
| Maternal age (year), median (IQR)                                    | 30.0 (26.0-34.0)     | 30.0 (26.0-35.0)      | 32.0 (29.0-35.0)                               | < 0.001 |
| Race, n (%)                                                          |                      |                       |                                                | 0.012   |
| Chinese                                                              | 393 (52.3)           | 38 (38.8)             | 37 (49.3)                                      |         |
| Indian                                                               | 88 (11.7)            | 6 (6.1)               | 6 (8.0)                                        |         |
| Malay                                                                | 186 (24.8)           | 41 (41.8)             | 23 (30.7)                                      |         |
| Others                                                               | 84 (11.2)            | 13 (13.3)             | 9 (12.0)                                       |         |
| Parity, n (%)                                                        |                      |                       |                                                | 0.091   |
| 0                                                                    | 419 (55.9)           | 49 (50.0)             | 33 (44.0)                                      |         |
| 1                                                                    | 236 (31.5)           | 32 (32.7)             | 25 (33.3)                                      |         |
| $\geq 2$                                                             | 95 (12.7)            | 17 (17.3)             | 17 (22.7)                                      |         |
| Maternal education levels, n (%)                                     |                      |                       |                                                | 0.044   |
| Less than high school                                                | 166 (22.2)           | 28 (28.6)             | 25 (33.3)                                      |         |
| High school                                                          | 299 (40.0)           | 44 (44.9)             | 23 (30.7)                                      |         |
| College and above                                                    | 282 (37.8)           | 26 (26.5)             | 27 (36.0)                                      |         |
| Married, n (%)                                                       | 699 (93.2)           | 90 (91.8)             | 72 (96.0)                                      | 0.544   |
| Smoking during pregnancy, n (%)                                      | 19 (2.5)             | 4 (4.1)               | 0 (0)                                          | 0.230   |
| Maternal BMI at 11-14 weeks of gestation (kg/m <sup>2</sup> ), n (%) |                      |                       |                                                | < 0.001 |
| < 18.5                                                               | 62 (8.3)             | 2 (2.0)               | 0 (0)                                          |         |
| 18.5-24.9                                                            | 475 (63.5)           | 32 (32.7)             | 16 (21.3)                                      |         |
| 25.0-29.9                                                            | 162 (21.7)           | 35 (35.7)             | 32 (42.7)                                      |         |
| $\geq 30.0$                                                          | 49 (6.6)             | 29 (29.6)             | 27 (36.0)                                      |         |

|                                    |                  |                  |                  |         |
|------------------------------------|------------------|------------------|------------------|---------|
| Diabetes mellitus, n (%)           | 7 (0.9)          | 2 (2.0)          | 5 (6.7)          | < 0.001 |
| ART conception, n (%)              | 31 (4.1)         | 4 (4.1)          | 2 (2.7)          | 0.826   |
| Antihypertensive medication, n (%) | 0 (0)            | 0 (0)            | 3 (4.0)          | < 0.001 |
| Pregnancy outcomes                 |                  |                  |                  |         |
| Delivery age (weeks), median (IQR) | 39.0 (38.1-39.7) | 38.7 (38.0-39.6) | 38.3 (37.6-39.1) | 0.001   |
| Birth weight (kg), median (IQR)    | 3.1 (2.9-3.4)    | 3.1 (2.9-3.5)    | 3.1 (2.8-3.4)    | 0.324   |
| Gestational hypertension, n (%)    | 10 (1.3)         | 3 (3.1)          | 5 (6.7)          | 0.004   |
| Preeclampsia, n (%)                | 6 (0.8)          | 3 (3.1)          | 12 (16.0)        | < 0.001 |
| Preterm preeclampsia, n (%)        | 4 (0.5)          | 0 (0)            | 5 (6.7)          | < 0.001 |
| Term preeclampsia, n (%)           | 2 (0.3)          | 3 (3.1)          | 7 (9.3)          | < 0.001 |

IQR: interquartile range; BMI: body mass index; ART: assisted reproductive technology; BP: blood pressure.

The prevalence of maternal preconception diabetes was 6.7% in hypertension groups which was significantly higher than that of the other two groups. However, the prevalence of conception with assisted reproductive technology (ART) were not significantly different among the three groups. As expected, the incidence of gestational hypertension (6.7%), preeclampsia (16.0%), preterm preeclampsia (6.7%) and term preeclampsia (9.3%) were the highest in the hypertension group. Women with hypertension had sustainable higher blood pressure levels during pregnancy (Table 2).

Table 2. Maternal blood pressure levels at 4 time points during pregnancy by maternal blood pressure at 11-14weeks in the NORA cohort.

| Variables | Normal BP<br>(n=750) | Elevated BP<br>(n=98) | Hypertension<br>(stage 1 and stage2)<br>(n=75) | P value |
|-----------|----------------------|-----------------------|------------------------------------------------|---------|
|-----------|----------------------|-----------------------|------------------------------------------------|---------|

SBP (mmHg), mean±SD

|                     |            |            |            |         |
|---------------------|------------|------------|------------|---------|
| 11-14 weeks         | 104.9±8.3  | 123.2±2.6  | 126.8±11.1 | < 0.001 |
| 18-22 weeks         | 105.9±10.1 | 118.6±9.9  | 124.0±10.5 | < 0.001 |
| 28-32 weeks         | 108.2±10.0 | 118.1±9.7  | 123.8±11.4 | < 0.001 |
| ≥34 weeks           | 110.5±10.7 | 119.5±10.6 | 126.1±15.5 | < 0.001 |
| DBP (mmHg), mean±SD |            |            |            |         |
| 11-14 weeks         | 63.6±6.8   | 71.4±4.4   | 80.8±7.0   | < 0.001 |
| 18-22 weeks         | 62.9±7.0   | 69.0±7.2   | 76.3±8.1   | < 0.001 |
| 28-32 weeks         | 64.0±6.9   | 69.8±6.6   | 76.6±9.0   | < 0.001 |
| ≥34 weeks           | 67.4±7.8   | 73.3±7.3   | 80.0±11.4  | < 0.001 |
| MAP (mmHg), mean±SD |            |            |            |         |
| 11-14 weeks         | 77.3±6.5   | 88.7±3.2   | 96.1±6.5   | < 0.001 |
| 18-22 weeks         | 77.2±7.2   | 85.5±7.3   | 92.2±8.2   | < 0.001 |
| 28-32 weeks         | 78.8±7.1   | 85.9±6.3   | 92.4±9.1   | < 0.001 |
| ≥34 weeks           | 81.8±8.1   | 88.7±7.6   | 95.4±11.9  | < 0.001 |

1 BP: blood pressure; SD: standard deviation; SBP: systolic blood pressure; DBP: diastolic blood  
 2 pressure; MAP: mean arterial pressure

3

4 Table 3 shows the values of angiogenic factors at 4 time points in the NORA  
 5 participants. Logarithm-transformed serum angiogenic factors levels at 4 time points  
 6 are presented as well (supplementary table 1). We used covariance analysis to control  
 7 for potential confounders that were reported to have impact on serum angiogenic  
 8 proteins levels, including maternal race, smoking, maternal BMI and gestational age  
 9 at blood collection. Overall, serum sFlt-1 concentrations continued rising throughout

1 pregnancy. PlGF levels increased from the first trimester, peaked at 28-32 weeks and  
2 declined afterwards. Consequently, high levels of sFlt-1/PlGF ratio were observed  
3 both at 11-14 weeks and 34 weeks onwards. The dynamic change of serum  
4 angiogenic factors during pregnancy was observed in all 3 groups. Maternal serum  
5 sFlt-1 and PlGF levels were not significantly different between elevated BP group and  
6 normal BP group at 4 time points during pregnancy. In hypertension group, a trend of  
7 higher maternal sFlt-1 concentrations was observed from early pregnancy and it was  
8 dramatically increased during the third trimester compared with sFlt-1 levels in  
9 normotensive women. In contrast, PlGF concentrations were not significantly  
10 different between hypertension group and normal BP group. Thus, sFlt-1/PlGF ratio  
11 in hypertensive women was significantly higher throughout pregnancy than that in  
12 normotensive women. Comparisons of angiogenic factors levels throughout gestation  
13 in women with or without preeclampsia in each group are presented in supplementary  
14 table 2.



Table 3. Maternal serum angiogenic factors levels at 4 time points during pregnancy by maternal blood pressure at 11-14 weeks in the NORA cohort.

| Angiogenic factors | Time points | Normal BP |                   | Elevated BP |                   |           | Hypertension (stage 1 and stage 2) |                   |           |
|--------------------|-------------|-----------|-------------------|-------------|-------------------|-----------|------------------------------------|-------------------|-----------|
|                    |             | N         | mean (95%CI) *    | N           | mean (95%CI) *    | P value † | N                                  | mean (95%CI) *    | P value ‡ |
| sFlt-1 (pg/ml)     | 11-14 weeks | 746       | 1585 (1549, 1622) | 98          | 1722 (1585, 1862) | 0.096     | 75                                 | 1758 (1585, 1950) | 0.079     |
|                    | 18-22 weeks | 745       | 1698 (1660, 1778) | 98          | 1738 (1585, 1950) | 0.824     | 75                                 | 1905 (1698, 2138) | 0.139     |
|                    | 28-32 weeks | 730       | 1660 (1585, 1698) | 92          | 1698 (1549, 1862) | 0.868     | 70                                 | 2042 (1820, 2291) | 0.001     |
|                    | ≥34 weeks   | 659       | 2570 (2512, 2692) | 82          | 2818 (2570, 3162) | 0.201     | 57                                 | 3311 (2951, 3802) | 0.000     |
| PlGF (pg/ml)       | 11-14 weeks | 746       | 37 (36, 38)       | 98          | 35 (32, 38)       | 0.243     | 75                                 | 35 (32, 39)       | 0.593     |
|                    | 18-22 weeks | 745       | 269 (257, 275)    | 98          | 245 (224, 269)    | 0.261     | 75                                 | 245 (219, 275)    | 0.364     |
|                    | 28-32 weeks | 730       | 617 (589, 646)    | 92          | 575 (501, 676)    | 0.718     | 70                                 | 537 (457, 631)    | 0.270     |
|                    | ≥34 weeks   | 659       | 380 (355, 398)    | 82          | 324 (269, 380)    | 0.178     | 57                                 | 339 (275, 427)    | 0.585     |
| sFlt-1/ PlGF ratio | 11-14 weeks | 746       | 42.7 (40.7, 44.7) | 98          | 50.1 (44.7, 55.0) | 0.013     | 75                                 | 50.1 (43.7, 56.2) | 0.042     |
|                    | 18-22 weeks | 745       | 6.5 (6.2, 6.8)    | 98          | 7.1 (6.3, 7.9)    | 0.201     | 75                                 | 7.8 (6.8, 8.9)    | 0.027     |
|                    | 28-32 weeks | 730       | 2.7 (2.5, 2.9)    | 92          | 2.9 (2.5, 3.5)    | 0.643     | 70                                 | 3.8 (3.1, 4.6)    | 0.005     |
|                    | ≥34 weeks   | 659       | 6.9 (6.3, 7.4)    | 82          | 8.9 (6.9, 11.2)   | 0.100     | 57                                 | 9.8 (7.4, 13.2)   | 0.044     |

BP, blood pressure; CI, confidence interval.

\*Means (95%CI) were adjusted for maternal race, smoking during pregnancy, maternal body mass index at blood test and gestational weeks at blood test from models with logarithm-transformed serum angiogenic factors levels as outcomes; presented as geometric means.

†statistically significant difference between normal BP and elevated BP groups.

‡statistically significant difference between normal BP and hypertension group.

1 Higher levels of DBP and MAP in early pregnancy were significantly associated with  
2 higher log-transformed sFlt-1 values throughout pregnancy. Meanwhile, higher SBP  
3 levels were significantly associated with lower log-transformed PlGF levels both at  
4 18-22 weeks ( $\beta = -0.02$  per 10 mmHg SBP,  $P = 0.011$ ) and at 28-32 weeks ( $\beta = -0.02$   
5 per 10 mmHg SBP,  $P = 0.031$ ). Thus, rises in maternal SBP, DBP and MAP in the first  
6 trimester were significantly associated with higher sFlt-1/PlGF ratios during  
7 pregnancy (supplementary table 3).

8  
9 Table 4 presents the significant association between blood pressure in early pregnancy  
10 and risks of preeclampsia (OR 2.5, 95% CI 1.5-4.0 per 10 mmHg SBP; OR 4.3, 95%  
11 CI 2.3-7.9 per 10 mmHg DBP; OR 4.1, 95% CI 2.2-7.7 per 10 mmHg MAP,  
12 respectively) after adjustment of potential confounders. Preterm preeclampsia was  
13 more closely associated with higher DBP than SBP (OR 6.0, 95% CI 2.3-7.9 per 10  
14 mmHg DBP vs. OR 1.9, 95% CI 0.9-3.8 per 10 mmHg SBP).

1  
2  
3  
4  
5 1 Table 4. Logistic regression analysis for maternal blood pressure at 11-14weeks and adverse pregnancy outcomes.

| Variable     | Preeclampsia     |                  | Preterm preeclampsia |                   | Term preeclampsia |                  |
|--------------|------------------|------------------|----------------------|-------------------|-------------------|------------------|
|              | Crude OR         | Adjusted OR*     | Crude OR             | Adjusted OR*      | Crude OR          | Adjusted OR*     |
|              | (95% CI)         | (95% CI)         | (95% CI)             | (95% CI)          | (95% CI)          | (95% CI)         |
| SBP (10mmHg) | 3.0 (1.9, 4.6) † | 2.5 (1.5, 4.0) † | 1.9 (1.1, 3.5)       | 1.9 (0.9, 3.8)    | 4.1 (2.2, 7.8) †  | 3.2 (1.6, 6.4) † |
| DBP (10mmHg) | 5.2 (2.9, 9.3) † | 4.3 (2.3, 7.9) † | 5.8 (2.4, 14.4) †    | 6.0 (2.3, 16.2) † | 4.4 (2.1, 9.1) †  | 3.1 (1.4, 6.8) † |
| MAP (10mmHg) | 5.1 (2.8, 9.0) † | 4.1 (2.2, 7.7) † | 5.1 (2.1, 11.9) †    | 5.6 (2.0, 15.5) † | 4.7 (2.2, 9.7) †  | 3.3 (1.5, 7.4) † |

15 2 OR, odds ratio; CI, confidence interval; SBP: systolic blood pressure; DBP: diastolic blood pressure; MAP: mean arterial pressure

16 3 \*Adjusted for maternal age, race, education, maternal body mass index at 11-14 weeks gestation and diabetes mellitus.

17 4 †P < 0.01.

18 5

19 6

---

## 1 Discussion

2 Our study confirmed that higher early pregnancy blood pressure levels were  
3 prospectively associated with increased risks of preeclampsia, including preterm and  
4 term preeclampsia. Furthermore, women with elevated blood pressure in early  
5 pregnancy already had a higher sFlt-1 level and sFlt-1/PlGF ratio in early gestation  
6 and throughout pregnancy. In contrast, PlGF levels in these women remained normal  
7 throughout gestation.

8  
9 It is well established that women with chronic hypertension have several times the  
10 risk of preeclampsia than normotensive women.<sup>14</sup> However, the pathogenesis is poorly  
11 understood and what role these angiogenic and anti-angiogenic factors play remains  
12 unclear. Although syncytiotrophoblast is a major source of sFlt-1 production,  
13 peripheral blood monocytes produce a small amount of sFlt-1 further stimulated by  
14 inflammation.<sup>15,16</sup> As chronic hypertension is often related to a chronic inflammatory  
15 status,<sup>17</sup> the slightly increased sFlt-1 level in hypertensive women in early pregnancy,  
16 as observed in our study, may reflect the chronic inflammatory status in early  
17 pregnancy. Our results showed that hypertensive women in early pregnancy might  
18 have an imbalanced angiogenic factors levels and such imbalanced angiogenic  
19 environment tended to continue during pregnancy, which might be associated with the  
20 increased risks of preeclampsia.

21  
22 On the other hand, maternal circulating PlGF is highly expressed by the placenta

1 during pregnancy. It has both vasculogenic and angiogenic functions<sup>18</sup> and its level is  
2 likely to reflect the placental health conditions. For example, low PIGF concentrations  
3 preceding clinical onset of preeclampsia often occur in early-onset rather than late-  
4 onset preeclampsia.<sup>19</sup> Women who develop preeclampsia with fetal growth restriction  
5 (FGR) have further decreased PIGF levels compared with women who develop  
6 preeclampsia without FGR.<sup>20-22</sup> Early-onset preeclampsia and placenta-derived FGR  
7 are associated with placenta pathology such as incomplete remodeling of spiral  
8 arteries, acute atherosclerosis and thrombosis in spiral arteries and syncytiotrophoblast  
9 necrosis.<sup>23,24</sup> In our study, women with elevated blood pressure in early pregnancy,  
10 the PIGF level remained by and large normal throughout pregnancy and newborn's  
11 birth weight was not significantly different among the three groups. Thus, our  
12 findings seem to suggest that the placental implantation and development might not  
13 be impaired in these women.

14  
15 As poor placentation is not a unique cause of developing preeclampsia, enhanced  
16 placental oxidative and endoplasmic reticulum stress and increased maternal systemic  
17 inflammatory responses are thought to play crucial roles in preeclampsia as well.<sup>25,26</sup>  
18 Thus, preexisting endothelial dysfunction in hypertensive women could be  
19 exacerbated as a result of physiological burden of pregnancy even without an  
20 abnormal placentation.<sup>27</sup> Taking all things considered, we propose that the imbalanced  
21 angiogenic factors environment and, perhaps more importantly, preexisting  
22 endothelial susceptibility and dysfunction, may play a critical role in the development

1 of preeclampsia in women with elevated blood pressure in early pregnancy.

2

3 To our best knowledge, this was the first prospective cohort study that illustrated the

4 dynamic changes of angiogenic and anti-angiogenic factors throughout pregnancy in

5 women with different blood pressure status in early pregnancy. The NORA cohort

6 was a well-performed prospective study with comprehensive information including

7 clinical, biophysical and biochemical markers. The follow-up rate was 99.1%

8 (926/934) at the end of pregnancy. Measurements of blood pressure and serum

9 angiogenic factors were performed according to standardized protocols. In our study,

10 three women reported using antihypertensive medications during pregnancy; thus, the

11 results should not be affected by the medication issue. On the other hand, as most of

12 our participants were low-risk pregnant women, our results may not be applicable to

13 high-risk women. As it was an observational study, the potential residual confounding

14 and selection bias might have some impacts on our results.

15

## 16 **Conclusion**

17 Women with elevated blood pressure in early pregnancy already had a higher sFlt-

18 1/PlGF ratio in early gestation and throughout pregnancy, and an increased risk of

19 preeclampsia. In contrast, PlGF levels in these women remained normal throughout

20 gestation. Our findings suggest that the imbalanced angiogenic factors levels

21 throughout gestation might play a crucial role in developing preeclampsia in women

22 with preexisting elevated blood pressure. Our study also supports that preconception

---

1 or early pregnancy high blood pressure, defined as SBP $\geq$ 130 mmHg or DBP $\geq$ 80  
2 mmHg according to 2017 ACC/AHA guideline, should cause clinical awareness both  
3 during pregnancy and in their later life.  
4  
5

For peer review only

---

## 1 **Acknowledgments**

2 We thank all the NORA cohort (Neonatal and Obstetrics Risks Assessment)  
3 participants for their commitment to the study, the NORA cohort investigators and  
4 staff.

## 5 **Author Contributions**

6 JZ: performed the statistical analysis, searched literature and drafted the manuscript. JZ  
7 (corresponding author): had the original idea, provided guidance for the statistical  
8 analysis and revised the manuscript. MJN, BC, GSY and KHT: participated in the data  
9 collection, reviewed and revised the manuscript.

10 **Funding:** The authors received no financial support for the research, authorship, and/or  
11 publication of this article.

12 **Competing interests:** None declared.

13 **Patient consent for publication:** Obtained.

14 **Ethics approval:** This study was approved by the SingHealth Centralised Institutional  
15 Review Board Ethics Committee, Singapore (CIRB Ref No. 2010/214/D).

16 **Provenance and peer review:** Not commissioned; externally peer reviewed.

17 **Data availability statement:** All data relevant to the study are included in the article  
18 or uploaded as supplementary information.

19



---

## References

1. Kendall RL, Thomas KA. Inhibition of vascular endothelial cell growth factor activity by an endogenously encoded soluble receptor. *Proc Natl Acad Sci U S A* 1993; 90:10705-10709.
2. Levine RJ, Maynard SE, Qian C, Lim KH, England LJ, Yu KF, *et al*. Circulating angiogenic factors and the risk of preeclampsia. *N Engl J Med* 2004; 350(7): 672-83.
3. Zeisler H, Llurba E, Chantraine F, Vatish M, Staff AC, Sennström M, *et al*. Predictive Value of the sFlt-1: PlGF Ratio in Women with Suspected Preeclampsia. *N Engl J Med* 2016 Jan 7;374(1):13-22.
4. NICE. PlGF-based Testing to Help Diagnose Suspected Pre-eclampsia (Triage PlGF Test, Elecsys Immunoassay sFlt-1/PlGF Ratio, DELFIA Xpress PlGF 1-2-3 Test, and BRAHMS sFlt-1 Kryptor/BRAHMS PlGF plus Kryptor PE ratio). Diagnostics Guidance 23. London: NICE, 2016.
5. Maynard SE, Min JY, Merchan J, Lim KH, Li J, Mondal S, *et al*. Excess placental soluble fms-like tyrosine kinase 1 (sFlt1) may contribute to endothelial dysfunction, hypertension, and proteinuria in preeclampsia. *J Clin Invest* 2003;111(5):649-58.
6. Sela S, Itin A, Natanson-Yaron S, Greenfield C, Goldman-Wohl D, Yagel S, *et al*. A novel human-specific soluble vascular endothelial growth factor receptor 1: cell-type-specific splicing and implications to vascular endothelial growth factor homeostasis and preeclampsia. *Circ Res* 2008;102(12):1566-74.
7. Gerber HP, Condorelli F, Park J, Ferrara N. Differential transcriptional regulation of the two vascular endothelial growth factor receptor genes. Flt-1, but not Flk-1/KDR, is up-regulated by hypoxia. *J Biol Chem* 1997;272(38):23659-67.
8. Warrington JP, George EM, Palei AC, Spradley FT, Granger JP. Recent advances in the understanding of the pathophysiology of preeclampsia. *Hypertension* 2013;62(4):666-73.
9. Yang J, Pearl M, DeLorenze GN, Romero R, Dong Z, Jelliffe-Pawlowski L, *et al*.

- 
- 1 Racial-ethnic differences in midtrimester maternal serum levels of angiogenic and  
2 antiangiogenic factors. *Am J Obstet Gynecol.* 2016; 215(3): 359.e1-9.
- 3 10. Ng QJ, Zhang J, Dai F, Ng MJ, Razali NS, Win NM, *et al.* Neonatal and Obstetric  
4 Risk Assessment (NORA) Pregnancy Cohort Study in Singapore. *Int J Gynaecol*  
5 *Obstet* 2018; 4(1): 31-37.
- 6 11. Pickering TG, Hall JE, Appel LJ, Falkner BE, Graves J, Hill MN, *et al.*  
7 Recommendations for blood pressure measurement in humans and experimental  
8 animals. *Circulation* 2005; 111:697-716.
- 9 12. Brown MA, Lindheimer MD, de Swiet M, Van Assche A, Moutquin JM. The  
10 classification and diagnosis of the hypertensive disorders of pregnancy: statement  
11 from the International Society for the Study of Hypertension in Pregnancy  
12 (ISSHP). *Hypertens Pregnancy* 2001; 20(1): IX-XIV.
- 13 13. Whelton PK, Carey RM, Aronow WS, Casey DE Jr, Collins KJ, Dennison  
14 Himmelfarb C, *et al.* 2017 ACC/AHA/AAPA/ABC/ACPM/AGS/APhA/ASH/  
15 ASPC/NMA/PCNA Guideline for the Prevention, Detection, Evaluation, and  
16 Management of High Blood Pressure in Adults: Executive Summary: A Report of  
17 the American College of Cardiology/American Heart Association Task Force on  
18 Clinical Practice Guidelines. *Hypertension* 2018;71(6):1269-1324.
- 19 14. Bartsch E, Medcalf KE, Park AL, Ray JG; High Risk of Pre-eclampsia  
20 Identification Group. Clinical risk factors for pre-eclampsia determined in early  
21 pregnancy: systematic review and meta-analysis of large cohort studies. *BMJ*  
22 2016;353: i1753.
- 23 15. Rajakumar A, Michael HM, Rajakumar PA, Shibata E, Hubel CA, Karumanchi  
24 SA, *et al.* Extra-placental expression of vascular endothelial growth factor  
25 receptor-1, (Flt-1) and soluble Flt-1 (sFlt-1), by peripheral blood mononuclear  
26 cells (PBMCs) in normotensive and preeclamptic pregnant women. *Placenta*  
27 2005;26(7):563-73.
- 28 16. Freeman DJ, McManus F, Brown EA, Cherry L, Norrie J, Ramsay JE, *et al.*  
29 Short- and long-term changes in plasma inflammatory markers associated with

- 
- 1 preeclampsia. *Hypertension* 2004;44(5):708-14.
- 2 17. Dinh QN, Drummond GR, Sobey CG, Chrissobolis S. Roles of inflammation,  
3 oxidative stress, and vascular dysfunction in hypertension. *Biomed Res Int* 2014;  
4 2014: 406960.
- 5 18. De Falco S. The discovery of placenta growth factor and its biological activity.  
6 *Exp Mol Med* 2012;44(1):1-9.
- 7 19. McElrath TF, Lim KH, Pare E, Rich-Edwards J, Pucci D, Troisi R, *et al.*  
8 Longitudinal evaluation of predictive value for preeclampsia of circulating  
9 angiogenic factors through pregnancy. *Am J Obstet Gynecol* 2012;207(5): 407.e1-  
10 7.
- 11 20. Powers RW, Roberts JM, Plymire DA, Pucci D, Datwyler SA, Laird DM, *et al.*  
12 Low placental growth factor across pregnancy identifies a subset of women with  
13 preterm preeclampsia: type 1 versus type 2 preeclampsia? *Hypertension*  
14 2012;60(1):239-46.
- 15 21. Romero R, Nien JK, Espinoza J, Todem D, Fu W, Chung H, *et al.* A longitudinal  
16 study of angiogenic (placental growth factor) and anti-angiogenic (soluble  
17 endoglin and soluble vascular endothelial growth factor receptor-1) factors in  
18 normal pregnancy and patients destined to develop preeclampsia and deliver a  
19 small for gestational age neonate. *J Matern Fetal Neonatal Med* 2008;21(1):9-23.
- 20 22. Chaiworapongsa T, Romero R, Whitten AE, Korzeniewski SJ, Chaemsaitong P,  
21 Hernandez-Andrade E, *et al.* The use of angiogenic biomarkers in maternal blood  
22 to identify which SGA fetuses will require a preterm delivery and mothers who  
23 will develop pre-eclampsia. *J Matern Fetal Neonatal Med* 2016;29(8):1214-28.
- 24 23. Nelson DB, Ziadie MS, McIntire DD, Rogers BB, Leveno KJ. Placental pathology  
25 suggesting that preeclampsia is more than one disease. *Am J Obstet Gynecol*  
26 2014;210(1): 66.e1-7.
- 27 24. Burton GJ, Jauniaux E. Pathophysiology of placental-derived fetal  
28 growth restriction. *Am J Obstet Gynecol*. 2018;218(2S): S745-S761.
- 29 25. Steegers EA, von Dadelszen P, Duvekot JJ, Pijnenborg R. Pre-eclampsia. *Lancet*

1  
2  
3  
4 1 2010;376(9741):631-44.

5  
6 2 26. Redman CW, Sargent IL, Staff AC. IFPA Senior Award Lecture: making sense of  
7  
8 3 pre-eclampsia - two placental causes of preeclampsia? *Placenta* 2014;35 Suppl:  
9  
10 4 S20-5.

11  
12 5 27. Ness RB, Roberts JM. Heterogeneous causes constituting the single syndrome of  
13  
14 6 preeclampsia: a hypothesis and its implications. *Am J Obstet Gynecol*  
15  
16 7 1996;175(5):1365-70.

17  
18 8

19  
20  
21 9  
22  
23  
24  
25  
26  
27  
28  
29  
30  
31  
32  
33  
34  
35  
36  
37  
38  
39  
40  
41  
42  
43  
44  
45  
46  
47  
48  
49  
50  
51  
52  
53  
54  
55  
56  
57  
58  
59  
60

1  
2  
3  
4  
5  
6  
7  
8  
9  
10  
11  
12  
13  
14  
15  
16  
17  
18  
19  
20  
21  
22  
23  
24  
25  
26  
27  
28  
29  
30  
31  
32  
33  
34  
35  
36  
37  
38  
39  
40  
41  
42  
43  
44  
45  
46  
47  
48  
49  
50  
51  
52  
53  
54  
55  
56  
57  
58  
59  
60

---

1 **Figure legends**

2 Figure 1. Flowchart of participants.

3

For peer review only



Supplementary table 1. Logarithm-transformed maternal serum angiogenic factors levels at 4 time points during pregnancy by maternal blood pressure at 11-14weeks in the NORA cohort.

| Angiogenic factors | Time points | Normal BP |                   | Elevated BP |                   |                            | Hypertension (stage 1 and stage 2) |    |                   |                            |           |
|--------------------|-------------|-----------|-------------------|-------------|-------------------|----------------------------|------------------------------------|----|-------------------|----------------------------|-----------|
|                    |             | N         | mean (95%CI) *    | N           | mean (95%CI) *    | Mean difference (95%CI) *† | P value †                          | N  | mean (95%CI) *    | Mean difference (95%CI) *‡ | P value ‡ |
| sFlt-1 (pg/ml)     | 11-14 weeks | 746       | 3.20 (3.19, 3.21) | 98          | 3.24 (3.20, 3.27) | 0.04 (-0.01, 0.08)         | 0.096                              | 75 | 3.24 (3.20, 3.29) | 0.05 (-0.01, 0.10)         | 0.079     |
|                    | 18-22 weeks | 745       | 3.23 (3.22, 3.25) | 98          | 3.24 (3.20, 3.29) | 0.01 (-0.04, 0.06)         | 0.824                              | 75 | 3.28 (3.23, 3.33) | 0.05 (-0.01, 0.11)         | 0.139     |
|                    | 28-32 weeks | 730       | 3.22 (3.20, 3.23) | 92          | 3.23 (3.19, 3.27) | 0.01 (-0.04, 0.06)         | 0.868                              | 70 | 3.31 (3.26, 3.36) | 0.09 (0.03, 0.15)          | 0.001     |
|                    | ≥34 weeks   | 659       | 3.41 (3.40, 3.43) | 82          | 3.45 (3.41, 3.50) | 0.04 (-0.02, 0.10)         | 0.201                              | 57 | 3.52 (3.47, 3.58) | 0.11 (0.04, 0.17)          | 0.000     |
| PlGF (pg/ml)       | 11-14 weeks | 746       | 1.57 (1.56, 1.58) | 98          | 1.54 (1.50, 1.58) | -0.03 (-0.08, 0.01)        | 0.243                              | 75 | 1.55 (1.50, 1.59) | -0.02 (-0.07, 0.03)        | 0.593     |
|                    | 18-22 weeks | 745       | 2.43 (2.41, 2.44) | 98          | 2.39 (2.35, 2.43) | -0.03 (-0.08, 0.02)        | 0.261                              | 75 | 2.39 (2.34, 2.44) | -0.03 (-0.09, 0.03)        | 0.364     |
|                    | 28-32 weeks | 730       | 2.79 (2.77, 2.81) | 92          | 2.76 (2.70, 2.83) | -0.02 (-0.10, 0.05)        | 0.718                              | 70 | 2.73 (2.66, 2.80) | -0.06 (-0.14, 0.03)        | 0.270     |
|                    | ≥34 weeks   | 659       | 2.58 (2.55, 2.60) | 82          | 2.51 (2.43, 2.58) | -0.07 (-0.17, 0.02)        | 0.178                              | 57 | 2.53 (2.44, 2.63) | -0.05 (-0.16, 0.07)        | 0.585     |
| sFlt-1/ PlGF ratio | 11-14 weeks | 746       | 1.63 (1.61, 1.65) | 98          | 1.70 (1.65, 1.74) | 0.07 (0.01, 0.13)          | 0.013                              | 75 | 1.70 (1.64, 1.75) | 0.07 (0.01, 0.13)          | 0.042     |
|                    | 18-22 weeks | 745       | 0.81 (0.79, 0.83) | 98          | 0.85 (0.80, 0.90) | 0.05 (-0.02, 0.11)         | 0.201                              | 75 | 0.89 (0.83, 0.95) | 0.08 (0.01, 0.15)          | 0.027     |

|             |     |                   |    |                   |                    |       |    |                   |                   |       |
|-------------|-----|-------------------|----|-------------------|--------------------|-------|----|-------------------|-------------------|-------|
| 28-32 weeks | 730 | 0.43 (0.40, 0.46) | 92 | 0.46 (0.39, 0.54) | 0.03 (-0.06, 0.13) | 0.643 | 70 | 0.58 (0.49, 0.66) | 0.15 (0.04, 0.25) | 0.005 |
| ≥34 weeks   | 659 | 0.84 (0.80, 0.87) | 82 | 0.95 (0.84, 1.05) | 0.11 (-0.02, 0.24) | 0.100 | 57 | 0.99 (0.87, 1.12) | 0.16 (0.01, 0.31) | 0.044 |

BP, blood pressure; CI, confidence interval.

\*Means (95%CI) were adjusted for maternal race, smoking during pregnancy, maternal body mass index at blood test and gestational weeks at blood test from models with logarithm-transformed serum angiogenic factors levels as outcomes;

†statistically significant difference between normal BP and elevated BP groups.

‡statistically significant difference between normal BP and hypertension group.



Supplementary table 2. Maternal serum angiogenic factors levels during pregnancy by preeclampsia in women with different BP status in early pregnancy.

| Angiogenic factors | Time points | Normal BP            |                      |                | Elevated BP          |                      |                | Hypertension (stage 1 and stage 2) |                      |                |
|--------------------|-------------|----------------------|----------------------|----------------|----------------------|----------------------|----------------|------------------------------------|----------------------|----------------|
|                    |             | PE                   | Non-PE               | <i>P</i> value | PE                   | Non-PE               | <i>P</i> value | PE                                 | Non-PE               | <i>P</i> value |
|                    |             | (n=6)                | (n=744)              |                | (n=3)                | (n=95)               |                | (n=12)                             | (n=63)               |                |
|                    |             | mean                 | mean                 |                | mean                 | mean                 |                | mean                               | mean                 |                |
|                    |             | (95%CI) *            | (95%CI) *            |                | (95%CI) *            | (95%CI) *            |                | (95%CI) *                          | (95%CI) *            |                |
| sFlt-1 (pg/ml)     | 11-14 weeks | 1514 (1096, 2089)    | 1622 (1549, 1660)    | 0.718          | 1778 (1096, 2884)    | 1622 (1514, 1778)    | 0.756          | 1349 (1122, 1622)                  | 1660 (1549, 1820)    | 0.048          |
|                    | 18-22 weeks | 1698 (1175, 2512)    | 1738 (1660, 1778)    | 0.925          | 1479 (813, 2692)     | 1660 (1514, 1862)    | 0.692          | 1738 (1288, 2291)                  | 1738 (1514, 1995)    | 0.960          |
|                    | 28-32 weeks | 3090 (2188, 4365)    | 1698 (1622, 1738)    | <0.001         | 1995 (1148, 3467)    | 1549 (1413, 1698)    | 0.388          | 3020 (2188, 4074)                  | 1622 (1445, 1862)    | <0.001         |
|                    | ≥34 weeks   | 6026 (3548, 10233)   | 2630 (2512, 2692)    | 0.002          | 3715 (2042, 6607)    | 2692 (2399, 2951)    | 0.295          | 6026 (3802, 9550)                  | 2951 (2570, 3388)    | 0.005          |
| PlGF (pg/ml)       | 11-14 weeks | 29.5 (21.4, 41.7)    | 37.2 (36.3, 38.0)    | 0.199          | 32.4 (20.0, 53.7)    | 36.3 (33.1, 38.9)    | 0.716          | 24.6 (19.1, 30.9)                  | 35.5 (32.4, 39.8)    | 0.005          |
|                    | 18-22 weeks | 208.9 (144.5, 309.0) | 269.2 (263.0, 281.8) | 0.191          | 182.0 (114.8, 288.4) | 239.9 (218.8, 257.0) | 0.257          | 151.4 (120.2, 190.6)               | 234.4 (213.8, 263.0) | 0.001          |
|                    | 28-32 weeks | 269.2 (158.5, 457.1) | 631.0 (602.6, 660.7) | 0.002          | 323.6 (166.0, 645.7) | 562.3 (501.2, 645.7) | 0.118          | 182.0 (120.2, 269.2)               | 588.8 (489.8, 691.8) | <0.001         |
|                    | ≥34 weeks   | 169.8 (67.6, 426.6)  | 380.2 (363.1, 407.4) | 0.083          | 208.9 (85.1, 512.9)  | 316.2 (269.2, 371.5) | 0.372          | 147.9 (66.1, 323.6)                | 323.6 (257.0, 416.9) | 0.059          |
| sFlt-1/ PlGF ratio | 11-14 weeks | 50.1 (33.1, 77.6)    | 42.7 (41.7, 44.7)    | 0.454          | 53.7 (28.8, 100.0)   | 45.7 (40.7, 50.1)    | 0.591          | 56.2 (42.7, 74.1)                  | 46.8 (41.7, 52.5)    | 0.235          |

|             |        |                       |        |       |                       |       |        |                        |        |
|-------------|--------|-----------------------|--------|-------|-----------------------|-------|--------|------------------------|--------|
| 18-22 weeks | 8.1    | (5.0, 6.5 (6.2, 6.6)  | 0.323  | 8.1   | (4.2, 7.1 (6.3, 7.9)  | 0.674 | 11.2   | (7.9, 7.4 (6.3, 8.5)   | 0.029  |
|             | 12.9)  |                       |        | 15.9) |                       |       | 16.2)  |                        |        |
| 28-32 weeks | 11.5   | (6.0, 2.7 (2.5, 2.8)  | <0.001 | 6.0   | (2.4, 2.8 (2.4, 3.2)  | 0.093 | 16.6   | (9.8, 2.8 (2.2, 3.6)   | <0.001 |
|             | 21.9)  |                       |        | 15.1) |                       |       | 28.2)  |                        |        |
| ≥34 weeks   | 35.5   | (10.5, 6.8 (6.3, 7.4) | 0.008  | 17.8  | (4.9, 8.5 (6.8, 10.7) | 0.269 | 40.7   | (14.5, 9.1 (6.6, 12.6) | 0.008  |
|             | 120.2) |                       |        | 64.6) |                       |       | 114.8) |                        |        |

BP, blood pressure; CI, confidence interval; PE, preeclampsia.

\*Means (95%CI) were adjusted for maternal race, smoking during pregnancy, maternal body mass index at blood test and gestational weeks at blood test from models with logarithm-transformed serum angiogenic factors levels as outcomes; presented as geometric means.

Supplementary table 3. Associations of maternal blood pressure at 11-14weeks with serum angiogenic factors levels during pregnancy.

| Variable                             | Time points     | Log sFlt-1          |                | Log PIGF              |                | Log sFlt-1/ PIGF ratio |                |
|--------------------------------------|-----------------|---------------------|----------------|-----------------------|----------------|------------------------|----------------|
|                                      |                 | $\beta$ (95% CI) *  | <i>P</i> value | $\beta$ (95% CI) *    | <i>P</i> value | $\beta$ (95% CI) *     | <i>P</i> value |
| Systolic blood pressure<br>(10mmHg)  | 11-14 weeks     | 0.01 (0.004, 0.03)  | 0.009          | -0.01 (-0.02, 0.0004) | 0.057          | 0.03 (0.01, 0.04)      | < 0.001        |
|                                      | 18-22 weeks     | 0.01 (-0.01, 0.02)  | 0.227          | -0.02 (-0.03, -0.004) | 0.011          | 0.02 (0.01, 0.04)      | 0.003          |
|                                      | 28-32 weeks     | 0.01 (-0.001, 0.02) | 0.068          | -0.02 (-0.04, -0.002) | 0.031          | 0.03 (0.01, 0.06)      | 0.007          |
|                                      | $\geq 34$ weeks | 0.02 (0.01, 0.03)   | 0.009          | -0.02 (-0.05, 0.001)  | 0.059          | 0.04 (0.01, 0.07)      | 0.011          |
| Diastolic blood pressure<br>(10mmHg) | 11-14 weeks     | 0.02 (0.01, 0.04)   | 0.002          | -0.01 (-0.03, 0.001)  | 0.069          | 0.04 (0.02, 0.05)      | < 0.001        |
|                                      | 18-22 weeks     | 0.02 (0.004, 0.04)  | 0.014          | -0.01 (-0.02, 0.01)   | 0.388          | 0.03 (0.01, 0.05)      | 0.008          |
|                                      | 28-32 weeks     | 0.04 (0.02, 0.05)   | < 0.001        | -0.02 (-0.04, 0.004)  | 0.104          | 0.05 (0.03, 0.08)      | < 0.001        |
|                                      | $\geq 34$ weeks | 0.04 (0.02, 0.06)   | < 0.001        | -0.02 (-0.05, 0.01)   | 0.134          | 0.06 (0.02, 0.10)      | 0.003          |
| Mean arterial pressure<br>(10mmHg)   | 11-14 weeks     | 0.02 (0.01, 0.04)   | 0.002          | -0.02 (-0.03, -0.001) | 0.043          | 0.04 (0.02, 0.06)      | < 0.001        |
|                                      | 18-22 weeks     | 0.02 (0.001, 0.03)  | 0.044          | -0.01 (-0.02, 0.01)   | 0.506          | 0.02 (0.002, 0.04)     | 0.030          |
|                                      | 28-32 weeks     | 0.03 (0.01, 0.04)   | 0.001          | -0.02 (-0.05, 0.001)  | 0.058          | 0.05 (0.02, 0.08)      | 0.001          |
|                                      | $\geq 34$ weeks | 0.04 (0.02, 0.05)   | < 0.001        | -0.03 (-0.06, -0.003) | 0.029          | 0.07 (0.03, 0.11)      | < 0.001        |

Abbreviations: CI, confidence interval.

\*Adjusted for maternal race, smoking during pregnancy, maternal body mass index at blood test and gestational weeks at blood test.

STROBE Statement—Checklist of items that should be included in reports of *cohort studies*

|                           | Item No | Recommendation                                                                                                                                                                                    |                                   |
|---------------------------|---------|---------------------------------------------------------------------------------------------------------------------------------------------------------------------------------------------------|-----------------------------------|
| <b>Title and abstract</b> | 1       | (a) Indicate the study's design with a commonly used term in the title or the abstract                                                                                                            | Page 2, line 9                    |
|                           |         | (b) Provide in the abstract an informative and balanced summary of what was done and what was found                                                                                               | Page 2-3                          |
| <b>Introduction</b>       |         |                                                                                                                                                                                                   |                                   |
| Background/rationale      | 2       | Explain the scientific background and rationale for the investigation being reported                                                                                                              | Page 5, line 14-22                |
| Objectives                | 3       | State specific objectives, including any prespecified hypotheses                                                                                                                                  | Page 6, line 1-4                  |
| <b>Methods</b>            |         |                                                                                                                                                                                                   |                                   |
| Study design              | 4       | Present key elements of study design early in the paper                                                                                                                                           | Page 6, line 8-9                  |
| Setting                   | 5       | Describe the setting, locations, and relevant dates, including periods of recruitment, exposure, follow-up, and data collection                                                                   | Page 6, line 8-22                 |
| Participants              | 6       | (a) Give the eligibility criteria, and the sources and methods of selection of participants. Describe methods of follow-up                                                                        | Page 7, line 2-14                 |
|                           |         | (b) For matched studies, give matching criteria and number of exposed and unexposed                                                                                                               | NA                                |
| Variables                 | 7       | Clearly define all outcomes, exposures, predictors, potential confounders, and effect modifiers. Give diagnostic criteria, if applicable                                                          | Page 7, line 16 ~ Page 8, line 12 |
| Data sources/measurement  | 8*      | For each variable of interest, give sources of data and details of methods of assessment (measurement). Describe comparability of assessment methods if there is more than one group              | Page 8, line 14 ~ Page 9, line 10 |
| Bias                      | 9       | Describe any efforts to address potential sources of bias                                                                                                                                         | Page 7, line 4-7                  |
| Study size                | 10      | Explain how the study size was arrived at                                                                                                                                                         | Page 7, line 7-14                 |
| Quantitative variables    | 11      | Explain how quantitative variables were handled in the analyses. If applicable, describe which groupings were chosen and why                                                                      | Page 8, line 6-12                 |
| Statistical methods       | 12      | (a) Describe all statistical methods, including those used to control for confounding                                                                                                             | Page 9, line 12~ Page 10, line 10 |
|                           |         | (b) Describe any methods used to examine subgroups and interactions                                                                                                                               | NA                                |
|                           |         | (c) Explain how missing data were addressed                                                                                                                                                       | NA                                |
|                           |         | (d) If applicable, explain how loss to follow-up was addressed                                                                                                                                    | NA                                |
|                           |         | (e) Describe any sensitivity analyses                                                                                                                                                             | NA                                |
| <b>Results</b>            |         |                                                                                                                                                                                                   |                                   |
| Participants              | 13*     | (a) Report numbers of individuals at each stage of study—eg numbers potentially eligible, examined for eligibility, confirmed eligible, included in the study, completing follow-up, and analysed | Page 10, line 17-20               |
|                           |         | (b) Give reasons for non-participation at each stage                                                                                                                                              | Page 7,                           |

|                          |     |                                                                                                                                                                                                              |                                    |
|--------------------------|-----|--------------------------------------------------------------------------------------------------------------------------------------------------------------------------------------------------------------|------------------------------------|
|                          |     |                                                                                                                                                                                                              | line 8-9                           |
|                          |     | (c) Consider use of a flow diagram                                                                                                                                                                           | Page 7, figure 1                   |
| Descriptive data         | 14* | (a) Give characteristics of study participants (eg demographic, clinical, social) and information on exposures and potential confounders                                                                     | Page 11, Table 1                   |
|                          |     | (b) Indicate number of participants with missing data for each variable of interest                                                                                                                          | Page 15, Table 3                   |
|                          |     | (c) Summarise follow-up time (eg, average and total amount)                                                                                                                                                  | Page 15, Table 3                   |
| Outcome data             | 15* | Report numbers of outcome events or summary measures over time                                                                                                                                               | Page 15, Table 3                   |
| Main results             | 16  | (a) Give unadjusted estimates and, if applicable, confounder-adjusted estimates and their precision (eg, 95% confidence interval). Make clear which confounders were adjusted for and why they were included | Page 15, Table 3, Page 17, Table 4 |
|                          |     | (b) Report category boundaries when continuous variables were categorized                                                                                                                                    | NA                                 |
|                          |     | (c) If relevant, consider translating estimates of relative risk into absolute risk for a meaningful time period                                                                                             | NA                                 |
| Other analyses           | 17  | Report other analyses done—eg analyses of subgroups and interactions, and sensitivity analyses                                                                                                               | NA                                 |
| <b>Discussion</b>        |     |                                                                                                                                                                                                              |                                    |
| Key results              | 18  | Summarise key results with reference to study objectives                                                                                                                                                     | Page 18, line 2-7                  |
| Limitations              | 19  | Discuss limitations of the study, taking into account sources of potential bias or imprecision. Discuss both direction and magnitude of any potential bias                                                   | Page 20, line 9-14                 |
| Interpretation           | 20  | Give a cautious overall interpretation of results considering objectives, limitations, multiplicity of analyses, results from similar studies, and other relevant evidence                                   | Page 20, line 17-22                |
| Generalisability         | 21  | Discuss the generalisability (external validity) of the study results                                                                                                                                        | Page 20, line 11-13                |
| <b>Other information</b> |     |                                                                                                                                                                                                              |                                    |
| Funding                  | 22  | Give the source of funding and the role of the funders for the present study and, if applicable, for the original study on which the present article is based                                                | Page 22, Line 12-13                |

\*Give information separately for exposed and unexposed groups.

**Note:** An Explanation and Elaboration article discusses each checklist item and gives methodological background and published examples of transparent reporting. The STROBE checklist is best used in conjunction with this article (freely available on the Web sites of PLoS Medicine at <http://www.plosmedicine.org/>, Annals of Internal Medicine at <http://www.annals.org/>, and Epidemiology at <http://www.epidem.com/>). Information on the STROBE Initiative is available at <http://www.strobe-statement.org>.
