# Supplementary material for: Angiogenic factors during pregnancy in Asian women with elevated blood pressure in early pregnancy and the risk of preeclampsia: a longitudinal cohort study
Source: PubMed Central journal article supplement — BMJ Open. 2019 Dec 1;9(11):e032237. doi: 10.1136/bmjopen-2019-032237 (PMC6924722; doi:10.1136/bmjopen-2019-032237), 2019-12-01
Supplement: bmjopen-2019-032237supp001.pdf [file bmjopen-2019-032237supp001.pdf]

Supplementary table 1. Logarithm-transformed maternal serum angiogenic factors levels at 4 time points during pregnancy by maternal blood pressure at 11-14weeks in the NORA cohort.

| Angiogenic factors | Time points | Normal BP |                   | Elevated BP |                   |                            |           | Hypertension (stage 1 and stage 2) |                   |                            |           |
|--------------------|-------------|-----------|-------------------|-------------|-------------------|----------------------------|-----------|------------------------------------|-------------------|----------------------------|-----------|
|                    |             | N         | mean (95%CI) *    | N           | mean (95%CI) *    | Mean difference (95%CI) *† | P value † | N                                  | mean (95%CI) *    | Mean difference (95%CI) *‡ | P value ‡ |
| sFlt-1 (pg/ml)     | 11-14 weeks | 746       | 3.20 (3.19, 3.21) | 98          | 3.24 (3.20, 3.27) | 0.04 (-0.01, 0.08)         | 0.096     | 75                                 | 3.24 (3.20, 3.29) | 0.05 (-0.01, 0.10)         | 0.079     |
|                    | 18-22 weeks | 745       | 3.23 (3.22, 3.25) | 98          | 3.24 (3.20, 3.29) | 0.01 (-0.04, 0.06)         | 0.824     | 75                                 | 3.28 (3.23, 3.33) | 0.05 (-0.01, 0.11)         | 0.139     |
|                    | 28-32 weeks | 730       | 3.22 (3.20, 3.23) | 92          | 3.23 (3.19, 3.27) | 0.01 (-0.04, 0.06)         | 0.868     | 70                                 | 3.31 (3.26, 3.36) | 0.09 (0.03, 0.15)          | 0.001     |
|                    | ≥34 weeks   | 659       | 3.41 (3.40, 3.43) | 82          | 3.45 (3.41, 3.50) | 0.04 (-0.02, 0.10)         | 0.201     | 57                                 | 3.52 (3.47, 3.58) | 0.11 (0.04, 0.17)          | 0.000     |
| PlGF (pg/ml)       | 11-14 weeks | 746       | 1.57 (1.56, 1.58) | 98          | 1.54 (1.50, 1.58) | -0.03 (-0.08, 0.01)        | 0.243     | 75                                 | 1.55 (1.50, 1.59) | -0.02 (-0.07, 0.03)        | 0.593     |
|                    | 18-22 weeks | 745       | 2.43 (2.41, 2.44) | 98          | 2.39 (2.35, 2.43) | -0.03 (-0.08, 0.02)        | 0.261     | 75                                 | 2.39 (2.34, 2.44) | -0.03 (-0.09, 0.03)        | 0.364     |
|                    | 28-32 weeks | 730       | 2.79 (2.77, 2.81) | 92          | 2.76 (2.70, 2.83) | -0.02 (-0.10, 0.05)        | 0.718     | 70                                 | 2.73 (2.66, 2.80) | -0.06 (-0.14, 0.03)        | 0.270     |
|                    | ≥34 weeks   | 659       | 2.58 (2.55, 2.60) | 82          | 2.51 (2.43, 2.58) | -0.07 (-0.17, 0.02)        | 0.178     | 57                                 | 2.53 (2.44, 2.63) | -0.05 (-0.16, 0.07)        | 0.585     |
| sFlt-1/ PlGF ratio | 11-14 weeks | 746       | 1.63 (1.61, 1.65) | 98          | 1.70 (1.65, 1.74) | 0.07 (0.01, 0.13)          | 0.013     | 75                                 | 1.70 (1.64, 1.75) | 0.07 (0.01, 0.13)          | 0.042     |
|                    | 18-22 weeks | 745       | 0.81 (0.79, 0.83) | 98          | 0.85 (0.80, 0.90) | 0.05 (-0.02, 0.11)         | 0.201     | 75                                 | 0.89 (0.83, 0.95) | 0.08 (0.01, 0.15)          | 0.027     |

|             |     |                   |    |                   |                    |       |    |                   |                   |       |
|-------------|-----|-------------------|----|-------------------|--------------------|-------|----|-------------------|-------------------|-------|
| 28-32 weeks | 730 | 0.43 (0.40, 0.46) | 92 | 0.46 (0.39, 0.54) | 0.03 (-0.06, 0.13) | 0.643 | 70 | 0.58 (0.49, 0.66) | 0.15 (0.04, 0.25) | 0.005 |
| ≥34 weeks   | 659 | 0.84 (0.80, 0.87) | 82 | 0.95 (0.84, 1.05) | 0.11 (-0.02, 0.24) | 0.100 | 57 | 0.99 (0.87, 1.12) | 0.16 (0.01, 0.31) | 0.044 |

BP, blood pressure; CI, confidence interval.

\*Means (95%CI) were adjusted for maternal race, smoking during pregnancy, maternal body mass index at blood test and gestational weeks at blood test from models with logarithm-transformed serum angiogenic factors levels as outcomes;

†statistically significant difference between normal BP and elevated BP groups.

‡statistically significant difference between normal BP and hypertension group.

Supplementary table 2. Maternal serum angiogenic factors levels during pregnancy by preeclampsia in women with different BP status in early pregnancy.

| Angiogenic factors | Time points | Normal BP            |                      |                | Elevated BP          |                      |                | Hypertension (stage 1 and stage 2) |                      |                |
|--------------------|-------------|----------------------|----------------------|----------------|----------------------|----------------------|----------------|------------------------------------|----------------------|----------------|
|                    |             | PE                   | Non-PE               | <i>P</i> value | PE                   | Non-PE               | <i>P</i> value | PE                                 | Non-PE               | <i>P</i> value |
|                    |             | (n=6)                | (n=744)              |                | (n=3)                | (n=95)               |                | (n=12)                             | (n=63)               |                |
|                    |             | mean                 | mean                 |                | mean                 | mean                 |                | mean                               | mean                 |                |
|                    |             | (95%CI) *            | (95%CI) *            |                | (95%CI) *            | (95%CI) *            |                | (95%CI) *                          | (95%CI) *            |                |
| sFlt-1 (pg/ml)     | 11-14 weeks | 1514 (1096, 2089)    | 1622 (1549, 1660)    | 0.718          | 1778 (1096, 2884)    | 1622 (1514, 1778)    | 0.756          | 1349 (1122, 1622)                  | 1660 (1549, 1820)    | 0.048          |
|                    | 18-22 weeks | 1698 (1175, 2512)    | 1738 (1660, 1778)    | 0.925          | 1479 (813, 2692)     | 1660 (1514, 1862)    | 0.692          | 1738 (1288, 2291)                  | 1738 (1514, 1995)    | 0.960          |
|                    | 28-32 weeks | 3090 (2188, 4365)    | 1698 (1622, 1738)    | <0.001         | 1995 (1148, 3467)    | 1549 (1413, 1698)    | 0.388          | 3020 (2188, 4074)                  | 1622 (1445, 1862)    | <0.001         |
|                    | ≥34 weeks   | 6026 (3548, 10233)   | 2630 (2512, 2692)    | 0.002          | 3715 (2042, 6607)    | 2692 (2399, 2951)    | 0.295          | 6026 (3802, 9550)                  | 2951 (2570, 3388)    | 0.005          |
| PlGF (pg/ml)       | 11-14 weeks | 29.5 (21.4, 41.7)    | 37.2 (36.3, 38.0)    | 0.199          | 32.4 (20.0, 53.7)    | 36.3 (33.1, 38.9)    | 0.716          | 24.6 (19.1, 30.9)                  | 35.5 (32.4, 39.8)    | 0.005          |
|                    | 18-22 weeks | 208.9 (144.5, 309.0) | 269.2 (263.0, 281.8) | 0.191          | 182.0 (114.8, 288.4) | 239.9 (218.8, 257.0) | 0.257          | 151.4 (120.2, 190.6)               | 234.4 (213.8, 263.0) | 0.001          |
|                    | 28-32 weeks | 269.2 (158.5, 457.1) | 631.0 (602.6, 660.7) | 0.002          | 323.6 (166.0, 645.7) | 562.3 (501.2, 645.7) | 0.118          | 182.0 (120.2, 269.2)               | 588.8 (489.8, 691.8) | <0.001         |
|                    | ≥34 weeks   | 169.8 (67.6, 426.6)  | 380.2 (363.1, 407.4) | 0.083          | 208.9 (85.1, 512.9)  | 316.2 (269.2, 371.5) | 0.372          | 147.9 (66.1, 323.6)                | 323.6 (257.0, 416.9) | 0.059          |
| sFlt-1/ PlGF ratio | 11-14 weeks | 50.1 (33.1, 77.6)    | 42.7 (41.7, 44.7)    | 0.454          | 53.7 (28.8, 100.0)   | 45.7 (40.7, 50.1)    | 0.591          | 56.2 (42.7, 74.1)                  | 46.8 (41.7, 52.5)    | 0.235          |

|             |                |                       |        |               |                       |       |                |                        |        |
|-------------|----------------|-----------------------|--------|---------------|-----------------------|-------|----------------|------------------------|--------|
| 18-22 weeks | 8.1<br>12.9)   | (5.0, 6.5 (6.2, 6.6)  | 0.323  | 8.1<br>15.9)  | (4.2, 7.1 (6.3, 7.9)  | 0.674 | 11.2<br>16.2)  | (7.9, 7.4 (6.3, 8.5)   | 0.029  |
| 28-32 weeks | 11.5<br>21.9)  | (6.0, 2.7 (2.5, 2.8)  | <0.001 | 6.0<br>15.1)  | (2.4, 2.8 (2.4, 3.2)  | 0.093 | 16.6<br>28.2)  | (9.8, 2.8 (2.2, 3.6)   | <0.001 |
| ≥34 weeks   | 35.5<br>120.2) | (10.5, 6.8 (6.3, 7.4) | 0.008  | 17.8<br>64.6) | (4.9, 8.5 (6.8, 10.7) | 0.269 | 40.7<br>114.8) | (14.5, 9.1 (6.6, 12.6) | 0.008  |

BP, blood pressure; CI, confidence interval; PE, preeclampsia.

\*Means (95%CI) were adjusted for maternal race, smoking during pregnancy, maternal body mass index at blood test and gestational weeks at blood test from models with logarithm-transformed serum angiogenic factors levels as outcomes; presented as geometric means.

Supplementary table 3. Associations of maternal blood pressure at 11-14weeks with serum angiogenic factors levels during pregnancy.

| Variable                             | Time points     | Log sFlt-1          |                | Log PIGF              |                | Log sFlt-1/ PIGF ratio |                |
|--------------------------------------|-----------------|---------------------|----------------|-----------------------|----------------|------------------------|----------------|
|                                      |                 | $\beta$ (95% CI) *  | <i>P</i> value | $\beta$ (95% CI) *    | <i>P</i> value | $\beta$ (95% CI) *     | <i>P</i> value |
| Systolic blood pressure<br>(10mmHg)  | 11-14 weeks     | 0.01 (0.004, 0.03)  | 0.009          | -0.01 (-0.02, 0.0004) | 0.057          | 0.03 (0.01, 0.04)      | < 0.001        |
|                                      | 18-22 weeks     | 0.01 (-0.01, 0.02)  | 0.227          | -0.02 (-0.03, -0.004) | 0.011          | 0.02 (0.01, 0.04)      | 0.003          |
|                                      | 28-32 weeks     | 0.01 (-0.001, 0.02) | 0.068          | -0.02 (-0.04, -0.002) | 0.031          | 0.03 (0.01, 0.06)      | 0.007          |
|                                      | $\geq 34$ weeks | 0.02 (0.01, 0.03)   | 0.009          | -0.02 (-0.05, 0.001)  | 0.059          | 0.04 (0.01, 0.07)      | 0.011          |
| Diastolic blood pressure<br>(10mmHg) | 11-14 weeks     | 0.02 (0.01, 0.04)   | 0.002          | -0.01 (-0.03, 0.001)  | 0.069          | 0.04 (0.02, 0.05)      | < 0.001        |
|                                      | 18-22 weeks     | 0.02 (0.004, 0.04)  | 0.014          | -0.01 (-0.02, 0.01)   | 0.388          | 0.03 (0.01, 0.05)      | 0.008          |
|                                      | 28-32 weeks     | 0.04 (0.02, 0.05)   | < 0.001        | -0.02 (-0.04, 0.004)  | 0.104          | 0.05 (0.03, 0.08)      | < 0.001        |
|                                      | $\geq 34$ weeks | 0.04 (0.02, 0.06)   | < 0.001        | -0.02 (-0.05, 0.01)   | 0.134          | 0.06 (0.02, 0.10)      | 0.003          |
| Mean arterial pressure<br>(10mmHg)   | 11-14 weeks     | 0.02 (0.01, 0.04)   | 0.002          | -0.02 (-0.03, -0.001) | 0.043          | 0.04 (0.02, 0.06)      | < 0.001        |
|                                      | 18-22 weeks     | 0.02 (0.001, 0.03)  | 0.044          | -0.01 (-0.02, 0.01)   | 0.506          | 0.02 (0.002, 0.04)     | 0.030          |
|                                      | 28-32 weeks     | 0.03 (0.01, 0.04)   | 0.001          | -0.02 (-0.05, 0.001)  | 0.058          | 0.05 (0.02, 0.08)      | 0.001          |
|                                      | $\geq 34$ weeks | 0.04 (0.02, 0.05)   | < 0.001        | -0.03 (-0.06, -0.003) | 0.029          | 0.07 (0.03, 0.11)      | < 0.001        |

Abbreviations: CI, confidence interval.

\*Adjusted for maternal race, smoking during pregnancy, maternal body mass index at blood test and gestational weeks at blood test.
